# Supplementary material for: Pangenome-spanning epistasis and coselection analysis via de Bruijn graphs
Source: Genome Res. 2024 Jul;34(7):1081–8. doi: 10.1101/gr.278485.123 (PMC11368177; doi:10.1101/gr.278485.123)
Supplement: Supplement 9 [file Supplemental_Table_2.xlsx]

## Sheet: Sheet1
Accession numbers and associated metadata for the E. faecalis dataset
ID	Lane	Run Accession	Name	latitude	longitude	ST	PANINI Panaroo cluster	PopPUNK cluster	Lab	Year	Isolation source	Hospital	Human sample type	Environment sample type	Food sample type	Animal sample type	Animal species	Country	Country Alpha3 code	Vancomycin	Amiglycoside	Macrolide	Lincosamide	Tetracycline	Phenicol¬†	Linezolid	Hybrid assembly circular	Hybrid partially contiguous
26975_2#16_1	26975_2#16	ERR4406357	E07132	52°30'	05°45'	97	62	4	UMCU	1940	Environment			Canal water (Old isolate)				the Netherlands	NLD	no	no	no	yes	no	no	no	yes	no
26975_2#17_1	26975_2#17	ERR4406358	E07133	NA	NA	72	46	17	UMCU	1943	Old human isolate		NA					NA	NA	no	no	no	yes	no	no	no	yes	no
26975_2#18_1	26975_2#18	ERR4406359	E07134	NA	NA	446	31	133	UMCU	1946	Others				Honey (Old isolate)			NA	NA	no	no	no	yes	no	no	no	yes	no
26975_2#19_1	26975_2#19	ERR4406360	E07135	47°00'	08°00'	40	25	1	UMCU	1946	Others				Bitter cheese (Old isolate)			Switzerland	CHE	no	no	no	yes	no	no	no	yes	no
26975_2#20_1	26975_2#20	ERR4406361	E07136	NA	NA	40	25	1	UMCU	1946	Old human isolate		Faeces					NA	NA	no	no	no	yes	no	no	no	yes	no
26975_2#21_1	26975_2#21	ERR4406362	E07137	NA	NA	113	23	101	UMCU	1946	Others				Dairy cheese (Old isolate)			NA	NA	no	no	no	yes	no	no	no	yes	no
26975_2#228_1	26975_2#228	ERR4406568	E07294	52°30'	05°45'	122	23	86	UMCU	1955	Old human isolate		Sputum					the Netherlands	NLD	no	no	no	yes	no	no	no	yes	no
26975_2#44_1	26975_2#44	ERR4406385	E07305	52°30'	05°45'	141	31	42	UMCU	1956	Old human isolate		Blood					the Netherlands	NLD	no	no	no	yes	no	no	no	yes	no
26975_2#39_1	26975_2#39	ERR4406380	E07293	52°30'	05°45'	NA	46	138	UMCU	1958	Old human isolate		Blood					the Netherlands	NLD	no	no	no	yes	no	no	no	yes	no
26975_2#41_1	26975_2#41	ERR4406382	E07301	52°30'	05°45'	74	21	53	UMCU	1958	Old human isolate		Throat					the Netherlands	NLD	no	no	no	yes	no	no	no	yes	no
26975_2#34_1	26975_2#34	ERR4406375	E07287	52°30'	05°45'	21	8	16	UMCU	1959	Old human isolate		Exudate					the Netherlands	NLD	no	no	no	yes	no	no	no	yes	no
26975_2#227_1	26975_2#227	ERR4406567	E07290	52°30'	05°45'	55	25	1	UMCU	1960	Old human isolate		Exudate					the Netherlands	NLD	no	no	no	yes	yes	no	no	yes	no
26975_2#30_1	26975_2#30	ERR4406371	E07282	52°30'	05°45'	25	13	4	UMCU	1960	Old human isolate		Throat					the Netherlands	NLD	no	no	no	yes	no	no	no	yes	no
26975_2#32_1	26975_2#32	ERR4406373	E07284	52°30'	05°45'	19	49	21	UMCU	1960	Old human isolate		Skin					the Netherlands	NLD	no	no	no	yes	yes	no	no	yes	no
26975_2#33_1	26975_2#33	ERR4406374	E07285	52°30'	05°45'	41	15	20	UMCU	1960	Old human isolate		Ear					the Netherlands	NLD	no	no	no	yes	no	no	no	yes	no
26975_2#35_1	26975_2#35	ERR4406376	E07288	52°30'	05°45'	25	13	4	UMCU	1960	Old human isolate		Exudate					the Netherlands	NLD	no	no	no	yes	no	no	no	yes	no
26975_2#36_1	26975_2#36	ERR4406377	E07289	52°30'	05°45'	NA	63	137	UMCU	1960	Old human isolate		NA					the Netherlands	NLD	no	no	no	yes	no	no	no	yes	no
26975_2#45_1	26975_2#45	ERR4406386	E07306	52°30'	05°45'	72	46	17	UMCU	1960	Old human isolate		Root canal					the Netherlands	NLD	no	no	no	yes	no	no	no	yes	no
26975_2#37_1	26975_2#37	ERR4406378	E07291	52°30'	05°45'	482	33	75	UMCU	1961	Old human isolate		Blood					the Netherlands	NLD	no	no	no	yes	no	no	no	yes	no
26975_2#42_1	26975_2#42	ERR4406383	E07302	52°30'	05°45'	97	62	4	UMCU	1961	Old human isolate		Vagina					the Netherlands	NLD	no	no	no	yes	no	no	no	yes	no
26975_2#43_1	26975_2#43	ERR4406384	E07304	52°30'	05°45'	NA	16	2	UMCU	1961	Old human isolate		Blood					the Netherlands	NLD	no	no	no	yes	no	no	no	yes	no
26975_2#38_1	26975_2#38	ERR4406379	E07292	52°30'	05°45'	9	64	7	UMCU	1962	Old human isolate		Cerebrospinal fluid					the Netherlands	NLD	no	yes	yes	yes	yes	yes	no	yes	no
26975_2#27_1	26975_2#27	ERR4406368	E07278	52°30'	05°45'	21	41	5	UMCU	1963	Old human isolate		Blood					the Netherlands	NLD	no	no	no	yes	no	no	no	yes	no
26975_2#29_1	26975_2#29	ERR4406370	E07281	52°30'	05°45'	NA	33	86	UMCU	1964	Old human isolate		Blood					the Netherlands	NLD	no	no	no	yes	no	no	no	yes	no
26975_2#31_1	26975_2#31	ERR4406372	E07283	52°30'	05°45'	25	13	4	UMCU	1964	Old human isolate		Respiratory tract					the Netherlands	NLD	no	no	no	yes	no	no	no	yes	no
26975_2#40_1	26975_2#40	ERR4406381	E07295	52°30'	05°45'	164	6	38	UMCU	1967	Old human isolate		Throat					the Netherlands	NLD	no	no	no	no	no	no	no	yes	no
26975_2#23_1	26975_2#23	ERR4406364	E07139	NA	NA	113	23	101	UMCU	1973	Environment			Silage (Old isolate)				NA	NA	no	no	no	yes	no	no	no	yes	no
26975_2#24_1	26975_2#24	ERR4406365	E07140	NA	NA	72	46	17	UMCU	1975	Old human isolate		NA					NA	NA	no	no	no	yes	no	no	no	yes	no
26975_2#25_1	26975_2#25	ERR4406366	E07141	NA	NA	72	46	17	UMCU	1975	Old human isolate		NA					NA	NA	no	no	no	yes	no	no	no	yes	no
26975_2#149_1	26975_2#149	ERR4406489	E00740	38°00'	-97°00'	6	24	2	UMCU	1985	Hospitalised patient	NA (Old isolate)	NA					the USA	USA	no	yes	yes	yes	no	no	no	yes	no
26975_2#145_1	26975_2#145	ERR4406485	E00004	NA	NA	6	24	2	UMCU	1987	Farm animal					Faeces (Old isolate)	Bovine (Bos taurus)	NA	NA	yes	yes	no	yes	no	no	no	yes	no
26975_2#26_1	26975_2#26	ERR4406367	E07142	NA	NA	30	35	15	UMCU	1990	Old human isolate		Urine					NA	NA	no	no	no	yes	yes	no	no	yes	no
27725_1#319_1	27725_1#319	ERR3769404	M428	42°50'	12°50'	6	24	2	HRYC	1993	Hospitalised patient	NA	Blood					Italy	ITA	yes	no	yes	yes	yes	yes	no	yes	no
26975_1#75_1	26975_1#75	ERR4406032	E01876	52°30'	05°45'	20	49	21	UMCU	1994	Farm animal					Joint	Pig (Sus scrofa domesticus)	the Netherlands	NLD	no	no	yes	yes	yes	no	no	yes	no
26975_1#13_1	26975_1#13	ERR4405970	E00168	52°30'	05°45'	72	46	17	UMCU	1996	Non-hospitalised person		Faeces					the Netherlands	NLD	no	no	no	yes	no	no	no	yes	no
26975_1#188_1	26975_1#188	ERR4406145	E03211	52°30'	05°45'	159	7	18	UMCU	1996	Hospitalised patient	VUMC	Blood					the Netherlands	NLD	no	yes	yes	yes	yes	no	no	yes	no
26975_1#268_1	26975_1#268	ERR4406225	E03812	52°30'	05°45'	40	34	1	UMCU	1996	Hospitalised patient	Erasmus MC	Blood					the Netherlands	NLD	no	yes	yes	yes	yes	yes	no	yes	no
26975_2#147_1	26975_2#147	ERR4406487	E00252	52°30'	05°45'	23	14	4	UMCU	1996	Farm animal					Faeces	Bovine (Bos taurus)	the Netherlands	NLD	yes	yes	yes	yes	yes	yes	no	yes	no
26975_2#152_1	26975_2#152	ERR4406492	E01873	52°30'	05°45'	29	11	72	UMCU	1996	Others					Blood	Tick (Ixodida)	the Netherlands	NLD	no	no	no	yes	no	no	no	yes	no
26975_2#206_1	26975_2#206	ERR4406546	E03206	52°30'	05°45'	2	57	23	UMCU	1996	Hospitalised patient	VUMC	Blood					the Netherlands	NLD	no	yes	yes	yes	no	no	no	yes	no
26975_1#11_1	26975_1#11	ERR4405968	E00117	52°30'	05°45'	16	16	3	UMCU	1997	Non-hospitalised person		Faeces					the Netherlands	NLD	no	no	no	yes	yes	no	no	yes	no
26975_1#12_1	26975_1#12	ERR4405969	E00118	52°30'	05°45'	49	54	14	UMCU	1997	Non-hospitalised person		Faeces					the Netherlands	NLD	no	no	no	yes	no	no	no	yes	no
26975_1#18_1	26975_1#18	ERR4405975	E00426	52°30'	05°45'	32	38	12	UMCU	1997	Farm animal					Faeces	Poultry	the Netherlands	NLD	yes	yes	yes	yes	yes	no	no	yes	no
26975_1#5_1	26975_1#5	ERR4405962	E00102	52°30'	05°45'	239	47	31	UMCU	1997	Non-hospitalised person		Faeces					the Netherlands	NLD	no	yes	no	yes	yes	no	no	yes	no
26975_2#146_1	26975_2#146	ERR4406486	E00113	52°30'	05°45'	126	32	99	UMCU	1997	Non-hospitalised person		Faeces					the Netherlands	NLD	no	no	no	yes	no	no	no	yes	no
26975_2#148_1	26975_2#148	ERR4406488	E00327	50°50'	04°00'	23	69	4	UMCU	1997	Non-hospitalised person		Respiratory tract					Belgium	BEL	yes	yes	yes	yes	yes	yes	no	yes	no
27688_1#124_1	27688_1#124	ERR3769053	Z34	40°00'	-04°00'	58	18	10	UNIV RIOJA	1997	Farm animal					Faeces	Pig (Sus scrofa domesticus)	Spain	ESP	no	no	yes	yes	yes	no	no	yes	no
27688_1#128_1	27688_1#128	ERR3769057	Z65	40°00'	-04°00'	719	48	105	UNIV RIOJA	1997	Farm animal					Faeces	Pig (Sus scrofa domesticus)	Spain	ESP	no	yes	yes	yes	yes	no	no	yes	no
27688_1#132_1	27688_1#132	ERR3769061	Z90	40°00'	-04°00'	16	16	3	UNIV RIOJA	1997	Farm animal					Faeces	Pig (Sus scrofa domesticus)	Spain	ESP	no	yes	yes	yes	yes	no	no	yes	no
27688_1#136_1	27688_1#136	ERR3769065	Z225	40°00'	-04°00'	134	53	106	UNIV RIOJA	1997	Others					Faeces	Dog (Canis lupus familiaris)	Spain	ESP	no	no	no	yes	yes	no	no	yes	no
27688_1#152_1	27688_1#152	ERR3769081	Z66	40°00'	-04°00'	719	48	105	UNIV RIOJA	1997	Farm animal					Faeces	Pig (Sus scrofa domesticus)	Spain	ESP	no	yes	yes	yes	yes	no	no	yes	no
27688_1#157_1	27688_1#157	ERR3769086	M228	40°00'	-04°00'	9	1	7	HRYC	1997	Hospitalised patient	Hospital Universitario Ramon y Cajal	Blood					Spain	ESP	no	yes	yes	yes	yes	yes	no	yes	no
27688_1#160_1	27688_1#160	ERR3769089	Z226	40°00'	-04°00'	134	53	106	UNIV RIOJA	1997	Others					Faeces	Dog (Canis lupus familiaris)	Spain	ESP	no	no	no	yes	yes	no	no	yes	no
27688_1#21_1	27688_1#21	ERR3768956	M95	40°00'	-04°00'	9	64	7	HRYC	1997	Hospitalised patient	Hospital Universitario Ramon y Cajal	Blood					Spain	ESP	no	yes	yes	yes	yes	no	no	yes	no
27688_1#285_1	27688_1#285	ERR3769214	Z103	40°00'	-04°00'	26	41	1	UNIV RIOJA	1997	Farm animal					Faeces	Pig (Sus scrofa domesticus)	Spain	ESP	no	yes	yes	yes	yes	yes	no	yes	no
27688_1#380_1	27688_1#380	ERR3769309	M235	40°00'	-04°00'	40	2	1	HRYC	1997	Hospitalised patient	Hospital Universitario Ramon y Cajal	Blood					Spain	ESP	no	no	no	yes	no	no	no	yes	no
27688_1#382_1	27688_1#382	ERR3769311	Z56	40°00'	-04°00'	58	18	10	UNIV RIOJA	1997	Farm animal					Faeces	Pig (Sus scrofa domesticus)	Spain	ESP	no	yes	yes	yes	yes	no	no	yes	no
27688_1#55_1	27688_1#55	ERR3768984	Z79	40°00'	-04°00'	58	18	10	UNIV RIOJA	1997	Farm animal					Faeces	Pig (Sus scrofa domesticus)	Spain	ESP	no	yes	yes	yes	yes	no	no	yes	no
27688_1#59_1	27688_1#59	ERR3768988	Z191	40°00'	-04°00'	49	54	14	UNIV RIOJA	1997	Farm animal					Faeces	Pig (Sus scrofa domesticus)	Spain	ESP	no	no	yes	yes	yes	no	no	yes	no
26975_1#21_1	26975_1#21	ERR4405978	E00981	52°30'	05°45'	610	11	123	UMCU	1998	Non-hospitalised person		Faeces					the Netherlands	NLD	no	no	no	yes	no	no	no	yes	no
26975_1#22_1	26975_1#22	ERR4405979	E00983	52°30'	05°45'	239	47	31	UMCU	1998	Non-hospitalised person		Faeces					the Netherlands	NLD	no	no	no	yes	no	no	no	yes	no
26975_1#25_1	26975_1#25	ERR4405982	E00989	52°30'	05°45'	613	23	95	UMCU	1998	Non-hospitalised person		Faeces					the Netherlands	NLD	no	no	no	yes	no	no	no	yes	no
26975_1#26_1	26975_1#26	ERR4405983	E00991	52°30'	05°45'	81	19	11	UMCU	1998	Non-hospitalised person		Faeces					the Netherlands	NLD	no	no	yes	yes	yes	no	no	yes	no
26975_1#29_1	26975_1#29	ERR4405986	E00994	52°30'	05°45'	NA	41	33	UMCU	1998	Non-hospitalised person		Faeces					the Netherlands	NLD	no	no	no	yes	yes	no	no	yes	no
26975_1#31_1	26975_1#31	ERR4405988	E00997	52°30'	05°45'	62	13	4	UMCU	1998	Non-hospitalised person		Faeces					the Netherlands	NLD	no	no	no	yes	yes	no	no	yes	no
26975_1#32_1	26975_1#32	ERR4405989	E00998	52°30'	05°45'	35	20	29	UMCU	1998	Non-hospitalised person		Faeces					the Netherlands	NLD	no	yes	yes	yes	yes	yes	no	yes	no
26975_1#33_1	26975_1#33	ERR4405990	E01000	52°30'	05°45'	147	32	61	UMCU	1998	Non-hospitalised person		Faeces					the Netherlands	NLD	no	no	no	yes	no	no	no	yes	no
26975_1#35_1	26975_1#35	ERR4405992	E01003	52°30'	05°45'	21	8	16	UMCU	1998	Non-hospitalised person		Faeces					the Netherlands	NLD	no	no	no	yes	no	no	no	yes	no
26975_1#37_1	26975_1#37	ERR4405994	E01005	52°30'	05°45'	84	6	73	UMCU	1998	Non-hospitalised person		Faeces					the Netherlands	NLD	no	no	no	no	no	no	no	yes	no
26975_1#39_1	26975_1#39	ERR4405996	E01008	52°30'	05°45'	228	38	74	UMCU	1998	Non-hospitalised person		Faeces					the Netherlands	NLD	no	no	no	yes	no	no	no	yes	no
26975_1#45_1	26975_1#45	ERR4406002	E01015	52°30'	05°45'	55	25	1	UMCU	1998	Non-hospitalised person		Faeces					the Netherlands	NLD	no	no	yes	yes	yes	yes	no	yes	no
26975_1#48_1	26975_1#48	ERR4406005	E01019	52°30'	05°45'	NA	45	128	UMCU	1998	Non-hospitalised person		Faeces					the Netherlands	NLD	no	no	no	yes	no	no	no	yes	no
26975_1#52_1	26975_1#52	ERR4406009	E01026	52°30'	05°45'	47	29	24	UMCU	1998	Non-hospitalised person		Faeces					the Netherlands	NLD	no	yes	yes	yes	yes	yes	no	yes	no
26975_1#63_1	26975_1#63	ERR4406020	E01049	52°30'	05°45'	NA	21	53	UMCU	1998	Non-hospitalised person		Faeces					the Netherlands	NLD	no	no	no	yes	no	no	no	yes	no
26975_1#66_1	26975_1#66	ERR4406023	E01055	52°30'	05°45'	613	23	95	UMCU	1998	Non-hospitalised person		Faeces					the Netherlands	NLD	no	no	no	yes	no	no	no	yes	no
26975_1#70_1	26975_1#70	ERR4406027	E01060	52°30'	05°45'	81	19	11	UMCU	1998	Non-hospitalised person		Faeces					the Netherlands	NLD	no	no	no	yes	no	no	no	yes	no
26975_2#150_1	26975_2#150	ERR4406490	E00974	52°30'	05°45'	388	65	18	UMCU	1998	Non-hospitalised person		Faeces					the Netherlands	NLD	no	yes	yes	yes	yes	no	no	yes	no
26975_1#117_1	26975_1#117	ERR4406074	E02672	52°30'	05°45'	697	16	118	UMCU	1999	Hospitalised patient	Radboud UMC	Blood					the Netherlands	NLD	no	no	no	yes	no	no	no	yes	no
26975_1#118_1	26975_1#118	ERR4406075	E02673	52°30'	05°45'	34	65	13	UMCU	1999	Hospitalised patient	Radboud UMC	Blood					the Netherlands	NLD	no	no	no	yes	yes	no	no	yes	no
26975_1#145_1	26975_1#145	ERR4406102	E02854	52°30'	05°45'	6	24	2	UMCU	1999	Hospitalised patient	LUMC	Blood					the Netherlands	NLD	no	yes	yes	yes	yes	no	no	yes	no
26975_1#146_1	26975_1#146	ERR4406103	E02855	52°30'	05°45'	6	50	2	UMCU	1999	Hospitalised patient	LUMC	Blood					the Netherlands	NLD	no	yes	yes	yes	no	no	no	yes	no
26975_1#276_1	26975_1#276	ERR4406233	E03906	52°30'	05°45'	159	33	18	UMCU	1999	Hospitalised patient	Erasmus MC	Blood					the Netherlands	NLD	no	no	yes	yes	no	no	no	yes	no
27725_1#12_1	27725_1#12	ERR3769319	M429	40°00'	-04°00'	6	24	2	HRYC	1999	Hospitalised patient	NA	Blood					Spain	ESP	yes	yes	yes	yes	yes	yes	no	yes	no
28099_2#314_1	28099_2#314	ERR3865183	F340	39°30'	-08°00'	63	16	10	UNIV PORTO	1999	Others				Retail poultry			Portugal	PRT	no	no	no	yes	yes	no	no	yes	no
28157_4#173_1	28157_4#173	ERR3904922	F323	39°30'	-08°00'	260	28	26	UNIV PORTO	1999	Others				Retail poultry			Portugal	PRT	no	no	yes	yes	yes	no	no	yes	no
28157_4#177_1	28157_4#177	ERR3904926	F23	39°30'	-08°00'	27	56	34	UNIV PORTO	1999	Others				Retail poultry			Portugal	PRT	no	no	yes	yes	yes	no	no	yes	no
28157_4#317_1	28157_4#317	ERR3905066	F186	39°30'	-08°00'	82	26	25	UNIV PORTO	1999	Others				Retail poultry			Portugal	PRT	no	no	no	yes	yes	no	no	yes	no
28157_4#40_1	28157_4#40	ERR3904789	F135	39°30'	-08°00'	NA	33	67	UNIV PORTO	1999	Others				Retail poultry			Portugal	PRT	no	no	yes	yes	yes	no	no	yes	no
26975_1#150_1	26975_1#150	ERR4406107	E02860	52°30'	05°45'	28	40	6	UMCU	2000	Hospitalised patient	LUMC	Blood					the Netherlands	NLD	no	yes	yes	yes	yes	yes	no	yes	no
26975_1#236_1	26975_1#236	ERR4406193	E03630	52°30'	05°45'	55	25	1	UMCU	2000	Hospitalised patient	Leyweg	Blood					the Netherlands	NLD	no	yes	yes	yes	yes	yes	no	yes	no
26975_1#279_1	26975_1#279	ERR4406236	E03930	52°30'	05°45'	8	30	8	UMCU	2000	Hospitalised patient	Erasmus MC	Blood					the Netherlands	NLD	no	no	no	yes	no	no	no	yes	no
26975_1#280_1	26975_1#280	ERR4406237	E03931	52°30'	05°45'	30	35	15	UMCU	2000	Hospitalised patient	Erasmus MC	Blood					the Netherlands	NLD	no	no	no	yes	no	no	no	yes	no
26975_1#157_1	26975_1#157	ERR4406114	E02873	52°30'	05°45'	9	1	7	UMCU	2001	Hospitalised patient	LUMC	Blood					the Netherlands	NLD	no	yes	yes	yes	yes	yes	no	yes	no
26975_1#241_1	26975_1#241	ERR4406198	E03647	52°30'	05°45'	25	13	4	UMCU	2001	Hospitalised patient	Leyweg	Blood					the Netherlands	NLD	no	yes	yes	yes	yes	yes	no	yes	no
26975_1#283_1	26975_1#283	ERR4406240	E03940	52°30'	05°45'	2	57	23	UMCU	2001	Hospitalised patient	Erasmus MC	Blood					the Netherlands	NLD	no	yes	yes	yes	no	no	no	yes	no
26975_2#162_1	26975_2#162	ERR4406502	E02982	52°30'	05°45'	56	35	15	UMCU	2001	Hospitalised patient	MC Alkmaar	Blood					the Netherlands	NLD	no	yes	no	yes	yes	no	no	yes	no
26975_2#165_1	26975_2#165	ERR4406505	E02989	52°30'	05°45'	258	31	100	UMCU	2001	Hospitalised patient	MC Alkmaar	Blood					the Netherlands	NLD	no	no	no	yes	no	no	no	yes	no
26975_2#184_1	26975_2#184	ERR4406524	E03081	52°30'	05°45'	64	3	8	UMCU	2001	Hospitalised patient	Antonius location Nieuwegein	Blood					the Netherlands	NLD	no	yes	yes	yes	yes	no	no	yes	no
26975_2#190_1	26975_2#190	ERR4406530	E03099	52°30'	05°45'	40	4	1	UMCU	2001	Hospitalised patient	Antonius location Nieuwegein	Blood					the Netherlands	NLD	no	yes	yes	yes	yes	yes	no	yes	no
26975_2#247_1	26975_2#247	ERR4406587	E03960	52°30'	05°45'	68	69	78	UMCU	2001	Hospitalised patient	Erasmus MC	Blood					the Netherlands	NLD	no	no	no	yes	no	no	no	yes	no
28099_2#118_1	28099_2#118	ERR3865035	H92	39°30'	-08°00'	631	47	47	UNIV PORTO	2001	Hospitalised patient	NA	NA					Portugal	PRT	no	no	no	yes	yes	no	no	yes	no
28099_2#139_1	28099_2#139	ERR3865051	H102	39°30'	-08°00'	239	47	31	UNIV PORTO	2001	Hospitalised patient	NA	NA					Portugal	PRT	no	no	no	yes	no	no	no	yes	no
28099_2#176_1	28099_2#176	ERR3865079	C325	39°30'	-08°00'	40	34	1	UNIV PORTO	2001	Non-hospitalised person		NA					Portugal	PRT	no	yes	yes	yes	yes	no	no	yes	no
28099_2#233_1	28099_2#233	ERR3865122	Ke10c1	39°30'	-08°00'	206	45	4	UNIV PORTO	2001	Non-hospitalised person		NA					Portugal	PRT	no	yes	yes	yes	yes	yes	no	yes	no
28099_2#241_1	28099_2#241	ERR3865128	C622	39°30'	-08°00'	211	39	49	UNIV PORTO	2001	Non-hospitalised person		NA					Portugal	PRT	no	yes	no	yes	yes	no	no	yes	no
28099_2#370_1	28099_2#370	ERR3865237	F745	39°30'	-08°00'	260	53	26	UNIV PORTO	2001	Others				Retail poultry			Portugal	PRT	no	yes	yes	yes	yes	no	no	yes	no
28099_2#73_1	28099_2#73	ERR3865002	H46	39°30'	-08°00'	21	41	5	UNIV PORTO	2001	Hospitalised patient	NA	NA					Portugal	PRT	no	no	no	yes	yes	no	no	yes	no
28099_2#75_1	28099_2#75	ERR3865004	F746	39°30'	-08°00'	249	60	41	UNIV PORTO	2001	Others				Retail poultry			Portugal	PRT	no	yes	yes	yes	yes	no	no	yes	no
28157_4#109_1	28157_4#109	ERR3904858	F688	39°30'	-08°00'	298	42	27	UNIV PORTO	2001	Others				Retail poultry			Portugal	PRT	no	yes	yes	yes	yes	no	no	yes	no
28157_4#117_1	28157_4#117	ERR3904866	F735	39°30'	-08°00'	22	44	5	UNIV PORTO	2001	Others				Retail poultry			Portugal	PRT	no	yes	yes	yes	yes	yes	no	yes	no
28157_4#137_1	28157_4#137	ERR3904886	F577	39°30'	-08°00'	49	54	14	UNIV PORTO	2001	Others				Retail poultry			Portugal	PRT	no	yes	no	yes	yes	no	no	yes	no
28157_4#145_1	28157_4#145	ERR3904894	F916	39°30'	-08°00'	721	16	112	UNIV PORTO	2001	Others				Retail poultry			Portugal	PRT	no	yes	no	yes	yes	no	no	yes	no
28157_4#152_1	28157_4#152	ERR3904901	C58	39°30'	-08°00'	26	41	1	UNIV PORTO	2001	Non-hospitalised person		NA					Portugal	PRT	no	yes	yes	yes	yes	yes	no	yes	no
28157_4#153_1	28157_4#153	ERR3904902	F559	39°30'	-08°00'	260	49	26	UNIV PORTO	2001	Others				Retail poultry			Portugal	PRT	no	no	no	yes	yes	no	no	yes	no
28157_4#156_1	28157_4#156	ERR3904905	C369	39°30'	-08°00'	55	25	1	UNIV PORTO	2001	Non-hospitalised person		NA					Portugal	PRT	no	yes	yes	yes	yes	yes	no	yes	no
28157_4#166_1	28157_4#166	ERR3904915	F642	39°30'	-08°00'	59	52	27	UNIV PORTO	2001	Others				Retail poultry			Portugal	PRT	no	yes	no	yes	yes	no	no	yes	no
28157_4#179_1	28157_4#179	ERR3904928	C64	39°30'	-08°00'	NA	69	93	UNIV PORTO	2001	Non-hospitalised person		NA					Portugal	PRT	no	yes	no	yes	yes	no	no	yes	no
28157_4#18_1	28157_4#18	ERR3904767	F871	39°30'	-08°00'	288	33	84	UNIV PORTO	2001	Others				Retail poultry			Portugal	PRT	no	yes	yes	yes	yes	no	no	yes	no
28157_4#191_1	28157_4#191	ERR3904940	C20	39°30'	-08°00'	275	63	19	UNIV PORTO	2001	Non-hospitalised person		NA					Portugal	PRT	no	yes	yes	yes	yes	no	no	yes	no
28157_4#207_1	28157_4#207	ERR3904956	C7	39°30'	-08°00'	21	37	5	UNIV PORTO	2001	Non-hospitalised person		NA					Portugal	PRT	no	no	no	yes	yes	no	no	yes	no
28157_4#282_1	28157_4#282	ERR3905031	E9	39°30'	-08°00'	NA	64	7	UNIV PORTO	2001	Environment			Sewage				Portugal	PRT	no	no	yes	yes	no	no	no	yes	no
28157_4#315_1	28157_4#315	ERR3905064	C18	39°30'	-08°00'	317	54	14	UNIV PORTO	2001	Non-hospitalised person		NA					Portugal	PRT	no	yes	yes	yes	yes	no	no	yes	no
28157_4#319_1	28157_4#319	ERR3905068	C502	39°30'	-08°00'	NA	12	166	UNIV PORTO	2001	Non-hospitalised person		NA					Portugal	PRT	no	no	yes	yes	no	yes	no	yes	no
28157_4#348_1	28157_4#348	ERR3905093	F812	39°30'	-08°00'	288	33	84	UNIV PORTO	2001	Others				Retail poultry			Portugal	PRT	no	yes	yes	yes	yes	no	no	yes	no
28157_4#356_1	28157_4#356	ERR3905099	F741	39°30'	-08°00'	NA	61	14	UNIV PORTO	2001	Others				Retail poultry			Portugal	PRT	no	yes	yes	yes	yes	no	no	yes	no
28157_4#36_1	28157_4#36	ERR3904785	F731	39°30'	-08°00'	245	61	14	UNIV PORTO	2001	Others				Retail poultry			Portugal	PRT	no	yes	yes	yes	yes	no	no	yes	no
28157_4#363_1	28157_4#363	ERR3905104	KE40C1	39°30'	-08°00'	21	8	16	UNIV PORTO	2001	Non-hospitalised person		NA					Portugal	PRT	no	yes	yes	yes	yes	yes	no	yes	no
28157_4#381_1	28157_4#381	ERR3905118	H148	39°30'	-08°00'	6	9	2	UNIV PORTO	2001	Hospitalised patient	NA	NA					Portugal	PRT	yes	yes	yes	yes	yes	no	no	yes	no
26975_1#129_1	26975_1#129	ERR4406086	E02725	52°30'	05°45'	579	38	39	UMCU	2002	Hospitalised patient	Radboud UMC	Blood					the Netherlands	NLD	no	no	no	yes	no	no	no	yes	no
26975_1#132_1	26975_1#132	ERR4406089	E02744	52°30'	05°45'	NA	3	8	UMCU	2002	Hospitalised patient	Radboud UMC	Blood					the Netherlands	NLD	no	no	yes	yes	yes	no	no	yes	no
26975_1#160_1	26975_1#160	ERR4406117	E02879	52°30'	05°45'	40	34	1	UMCU	2002	Hospitalised patient	LUMC	Blood					the Netherlands	NLD	no	no	no	yes	yes	no	no	yes	no
26975_1#180_1	26975_1#180	ERR4406137	E03110	52°30'	05°45'	NA	33	120	UMCU	2002	Hospitalised patient	Antonius location Nieuwegein	Blood					the Netherlands	NLD	no	no	no	yes	no	no	no	yes	no
26975_1#246_1	26975_1#246	ERR4406203	E03665	52°30'	05°45'	28	10	6	UMCU	2002	Hospitalised patient	Leyweg	Blood					the Netherlands	NLD	no	yes	yes	yes	yes	no	no	yes	no
26975_1#366_1	26975_1#366	ERR4406323	E02996	52°30'	05°45'	28	10	6	UMCU	2002	Hospitalised patient	MC Alkmaar	Blood					the Netherlands	NLD	no	yes	yes	yes	yes	no	no	yes	no
26975_1#368_1	26975_1#368	ERR4406325	E03975	52°30'	05°45'	159	7	18	UMCU	2002	Hospitalised patient	Erasmus MC	Blood					the Netherlands	NLD	no	yes	yes	yes	yes	no	no	yes	no
26975_1#369_1	26975_1#369	ERR4406326	E03981	52°30'	05°45'	28	40	6	UMCU	2002	Hospitalised patient	Erasmus MC	Blood					the Netherlands	NLD	no	yes	yes	yes	yes	yes	no	yes	no
26975_1#372_1	26975_1#372	ERR4406329	E03990	52°30'	05°45'	30	35	15	UMCU	2002	Hospitalised patient	Erasmus MC	Blood					the Netherlands	NLD	no	no	yes	yes	yes	no	no	yes	no
26975_2#138_1	26975_2#138	ERR4406478	E03103	52°30'	05°45'	19	49	21	UMCU	2002	Hospitalised patient	Antonius location Nieuwegein	Blood					the Netherlands	NLD	no	no	no	yes	yes	no	no	yes	no
26975_2#191_1	26975_2#191	ERR4406531	E03105	52°30'	05°45'	44	2	22	UMCU	2002	Hospitalised patient	Antonius location Nieuwegein	Blood					the Netherlands	NLD	no	no	no	yes	yes	no	no	yes	no
26975_2#221_1	26975_2#221	ERR4406561	E03331	52°30'	05°45'	16	32	3	UMCU	2002	Hospitalised patient	VUMC	Blood					the Netherlands	NLD	no	yes	yes	yes	yes	no	no	yes	no
28099_2#18_1	28099_2#18	ERR3864961	H204	39°30'	-08°00'	310	14	22	UNIV PORTO	2002	Hospitalised patient	NA	Exudate					Portugal	PRT	no	no	yes	yes	yes	no	no	yes	no
28099_2#292_1	28099_2#292	ERR3865166	H192	39°30'	-08°00'	21	37	5	UNIV PORTO	2002	Hospitalised patient	NA	NA					Portugal	PRT	no	no	no	yes	yes	no	no	yes	no
28157_4#135_1	28157_4#135	ERR3904884	H189	39°30'	-08°00'	319	24	2	UNIV PORTO	2002	Hospitalised patient	NA	NA					Portugal	PRT	no	no	no	yes	yes	no	no	yes	no
28157_4#139_1	28157_4#139	ERR3904888	E290	39°30'	-08°00'	35	20	29	UNIV PORTO	2002	Environment			Sewage				Portugal	PRT	no	yes	yes	yes	yes	yes	no	yes	no
28157_4#278_1	28157_4#278	ERR3905027	E264	39°30'	-08°00'	16	48	3	UNIV PORTO	2002	Environment			Sewage				Portugal	PRT	no	yes	yes	yes	yes	no	no	yes	no
26975_1#168_1	26975_1#168	ERR4406125	E02915	52°30'	05°45'	64	3	8	UMCU	2003	Hospitalised patient	LUMC	Blood					the Netherlands	NLD	no	no	no	yes	yes	no	no	yes	no
26975_1#194_1	26975_1#194	ERR4406151	E03356	52°30'	05°45'	855	12	122	UMCU	2003	Hospitalised patient	VUMC	Blood					the Netherlands	NLD	no	no	no	yes	no	no	no	yes	no
26975_1#214_1	26975_1#214	ERR4406171	E03524	52°30'	05°45'	122	33	86	UMCU	2003	Hospitalised patient	MC Leeuwarden	Blood					the Netherlands	NLD	no	no	no	yes	no	no	no	yes	no
26975_1#74_1	26975_1#74	ERR4406031	E01872	52°30'	05°45'	16	48	3	UMCU	2003	Others					Cerumen	Dog (Canis lupus familiaris)	the Netherlands	NLD	no	yes	yes	yes	yes	yes	no	yes	no
26975_1#85_1	26975_1#85	ERR4406042	E02488	52°30'	05°45'	16	32	3	UMCU	2003	Hospitalised patient	ETZ Elisabeth	Blood					the Netherlands	NLD	no	yes	yes	yes	yes	no	no	yes	no
26975_2#172_1	26975_2#172	ERR4406512	E03029	52°30'	05°45'	64	3	8	UMCU	2003	Hospitalised patient	MC Alkmaar	Blood					the Netherlands	NLD	no	yes	yes	yes	yes	no	no	yes	no
26975_2#195_1	26975_2#195	ERR4406535	E03119	52°30'	05°45'	28	40	6	UMCU	2003	Hospitalised patient	Antonius location Nieuwegein	Blood					the Netherlands	NLD	no	yes	no	yes	yes	no	no	yes	no
26975_2#225_1	26975_2#225	ERR4406565	E03379	52°30'	05°45'	16	32	3	UMCU	2003	Hospitalised patient	VUMC	Blood					the Netherlands	NLD	no	yes	yes	yes	yes	no	no	yes	no
27688_1#210_1	27688_1#210	ERR3769139	M471	20°00'	77°00'	28	40	6	HRYC	2003	Hospitalised patient	Sri Ramachandra Medical College	Exudate					India	IND	no	yes	yes	yes	yes	no	no	yes	no
26975_1#182_1	26975_1#182	ERR4406139	E03147	52°30'	05°45'	21	41	5	UMCU	2004	Hospitalised patient	Antonius location Nieuwegein	Blood					the Netherlands	NLD	no	no	no	yes	yes	no	no	yes	no
26975_1#253_1	26975_1#253	ERR4406210	E03686	52°30'	05°45'	16	32	3	UMCU	2004	Hospitalised patient	Leyweg	Blood					the Netherlands	NLD	no	yes	yes	yes	yes	yes	no	yes	no
26975_1#367_1	26975_1#367	ERR4406324	E02523	52°30'	05°45'	40	39	1	UMCU	2004	Hospitalised patient	ETZ Elisabeth	Blood					the Netherlands	NLD	no	no	no	yes	yes	no	no	yes	no
26975_1#381_1	26975_1#381	ERR4406338	E04018	52°30'	05°45'	6	24	2	UMCU	2004	Hospitalised patient	Erasmus MC	Blood					the Netherlands	NLD	no	no	yes	yes	yes	no	no	yes	no
26975_1#382_1	26975_1#382	ERR4406339	E04028	52°30'	05°45'	191	53	33	UMCU	2004	Hospitalised patient	Erasmus MC	Blood					the Netherlands	NLD	no	no	no	yes	yes	no	no	yes	no
26975_1#88_1	26975_1#88	ERR4406045	E02498	52°30'	05°45'	4	55	12	UMCU	2004	Hospitalised patient	ETZ Elisabeth	Blood					the Netherlands	NLD	no	no	no	yes	no	no	no	yes	no
26975_1#89_1	26975_1#89	ERR4406046	E02507	52°30'	05°45'	6	24	2	UMCU	2004	Hospitalised patient	ETZ Elisabeth	Blood					the Netherlands	NLD	no	yes	yes	yes	yes	no	no	yes	no
26975_2#175_1	26975_2#175	ERR4406515	E03045	52°30'	05°45'	30	35	15	UMCU	2004	Hospitalised patient	MC Alkmaar	Blood					the Netherlands	NLD	no	no	no	yes	yes	no	no	yes	no
26975_2#198_1	26975_2#198	ERR4406538	E03139	52°30'	05°45'	147	32	61	UMCU	2004	Hospitalised patient	Antonius location Nieuwegein	Blood					the Netherlands	NLD	no	no	no	yes	no	no	no	yes	no
26975_2#200_1	26975_2#200	ERR4406540	E03150	52°30'	05°45'	6	58	2	UMCU	2004	Hospitalised patient	Antonius location Nieuwegein	Blood					the Netherlands	NLD	no	yes	yes	yes	yes	no	no	yes	no
26975_2#226_1	26975_2#226	ERR4406566	E03386	52°30'	05°45'	NA	12	135	UMCU	2004	Hospitalised patient	VUMC	Blood					the Netherlands	NLD	no	no	no	yes	no	no	no	yes	no
27688_1#153_1	27688_1#153	ERR3769082	M495	20°00'	77°00'	NA	3	8	HRYC	2004	Hospitalised patient	Sri Ramachandra Medical College	Blood					India	IND	no	yes	yes	yes	yes	yes	no	yes	no
27688_1#43_1	27688_1#43	ERR3768972	C2278	40°00'	-04°00'	17	1	7	UNIV RIOJA	2004	Hospitalised patient	E. Cercenado. HospGregorio Maranon	Urine					Spain	ESP	no	yes	yes	yes	yes	no	no	yes	no
27688_1#45_1	27688_1#45	ERR3768974	M492	20°00'	77°00'	4	69	60	HRYC	2004	Hospitalised patient	Sri Ramachandra Medical College	Urine					India	IND	no	yes	no	yes	yes	no	no	yes	no
27688_1#88_1	27688_1#88	ERR3769017	M480	20°00'	77°00'	241	16	35	HRYC	2004	Hospitalised patient	Sri Ramachandra Medical College	Urine					India	IND	no	no	no	yes	no	no	no	yes	no
26975_1#104_1	26975_1#104	ERR4406061	E02604	52°30'	05°45'	28	10	6	UMCU	2005	Hospitalised patient	Radboud UMC	Blood					the Netherlands	NLD	no	yes	yes	yes	yes	no	no	yes	no
26975_1#105_1	26975_1#105	ERR4406062	E02609	52°30'	05°45'	28	10	6	UMCU	2005	Hospitalised patient	Radboud UMC	Blood					the Netherlands	NLD	no	yes	yes	yes	yes	no	no	yes	no
26975_1#107_1	26975_1#107	ERR4406064	E02619	52°30'	05°45'	6	24	2	UMCU	2005	Hospitalised patient	Radboud UMC	Blood					the Netherlands	NLD	no	yes	no	yes	yes	no	no	yes	no
26975_1#204_1	26975_1#204	ERR4406161	E03438	52°30'	05°45'	28	10	6	UMCU	2005	Hospitalised patient	VUMC	Blood					the Netherlands	NLD	no	yes	no	yes	yes	no	no	yes	no
26975_1#262_1	26975_1#262	ERR4406219	E03724	52°30'	05°45'	41	15	20	UMCU	2005	Hospitalised patient	Leyweg	Blood					the Netherlands	NLD	no	no	yes	yes	yes	yes	no	yes	no
26975_2#102_1	26975_2#102	ERR4406442	E07779	40°00'	-04°00'	245	61	14	UMCU	2005	Wild bird					NA	Griffon vulture (Gyps fulvus)	Spain	ESP	no	yes	yes	yes	yes	no	no	yes	no
26975_2#106_1	26975_2#106	ERR4406446	E07784	40°00'	-04°00'	631	47	47	UMCU	2005	Wild bird					NA	Wild duck (Anatidae)	Spain	ESP	no	no	no	yes	yes	no	no	yes	no
26975_2#107_1	26975_2#107	ERR4406447	E07785	40°00'	-04°00'	118	23	98	UMCU	2005	Wild bird					NA	Common blackbird (Turdus merula)	Spain	ESP	no	yes	yes	yes	yes	no	no	yes	no
26975_2#114_1	26975_2#114	ERR4406454	E07794	40°00'	-04°00'	36	56	88	UMCU	2005	Wild bird					NA	White stork (Ciconia ciconia)	Spain	ESP	no	yes	yes	yes	yes	no	no	yes	no
26975_2#115_1	26975_2#115	ERR4406455	E07795	40°00'	-04°00'	245	61	14	UMCU	2005	Wild bird					NA	White stork (Ciconia ciconia)	Spain	ESP	no	yes	yes	yes	yes	no	no	yes	no
26975_2#130_1	26975_2#130	ERR4406470	E07816	40°00'	-04°00'	403	11	94	UMCU	2005	Wild bird					NA	Bustards (Otididae)	Spain	ESP	no	no	no	yes	no	no	no	yes	no
26975_2#160_1	26975_2#160	ERR4406500	E02969	52°30'	05°45'	230	6	89	UMCU	2005	Hospitalised patient	LUMC	Blood					the Netherlands	NLD	no	no	no	yes	no	no	no	yes	no
26975_2#180_1	26975_2#180	ERR4406520	E03061	52°30'	05°45'	168	46	17	UMCU	2005	Hospitalised patient	MC Alkmaar	Blood					the Netherlands	NLD	no	no	no	yes	no	no	no	yes	no
26975_2#2_1	26975_2#2	ERR4406343	E04067	52°30'	05°45'	44	2	22	UMCU	2005	Hospitalised patient	Erasmus MC	Blood					the Netherlands	NLD	no	no	no	yes	yes	no	no	yes	no
26975_2#201_1	26975_2#201	ERR4406541	E03152	52°30'	05°45'	40	34	1	UMCU	2005	Hospitalised patient	Antonius location Nieuwegein	Blood					the Netherlands	NLD	no	no	yes	yes	yes	yes	no	yes	no
26975_2#229_1	26975_2#229	ERR4406569	E07731	40°00'	-04°00'	639	14	136	UMCU	2005	Wild bird					NA	Stone-curlew (Burhinidae)	Spain	ESP	no	no	no	yes	no	no	no	yes	no
26975_2#231_1	26975_2#231	ERR4406571	E07737	40°00'	-04°00'	177	42	54	UMCU	2005	Wild bird					NA	White stork (Ciconia ciconia)	Spain	ESP	no	no	no	yes	no	no	no	yes	no
26975_2#69_1	26975_2#69	ERR4406410	E07741	40°00'	-04°00'	81	19	11	UMCU	2005	Wild bird					NA	Hawk (Accipitridae)	Spain	ESP	no	no	yes	yes	yes	no	no	yes	no
26975_2#74_1	26975_2#74	ERR4406414	E07749	40°00'	-04°00'	287	6	38	UMCU	2005	Wild bird					NA	White stork (Ciconia ciconia)	Spain	ESP	no	yes	yes	yes	yes	no	no	yes	no
26975_2#83_1	26975_2#83	ERR4406423	E07758	40°00'	-04°00'	310	14	22	UMCU	2005	Wild bird					NA	Western marsh harrier (Circus aeruginosus)	Spain	ESP	no	no	yes	yes	yes	no	no	yes	no
26975_2#91_1	26975_2#91	ERR4406431	E07767	40°00'	-04°00'	192	21	48	UMCU	2005	Wild bird					NA	Owl (Strigiformes)	Spain	ESP	no	no	yes	yes	yes	no	no	yes	no
26975_2#97_1	26975_2#97	ERR4406437	E07773	40°00'	-04°00'	81	19	11	UMCU	2005	Wild bird					NA	Common blackbird (Turdus merula)	Spain	ESP	no	no	no	yes	no	no	no	yes	no
26975_1#111_1	26975_1#111	ERR4406068	E02646	52°30'	05°45'	133	52	4	UMCU	2006	Hospitalised patient	Radboud UMC	Blood					the Netherlands	NLD	no	no	no	yes	no	no	no	yes	no
26975_1#263_1	26975_1#263	ERR4406220	E03725	52°30'	05°45'	72	46	17	UMCU	2006	Hospitalised patient	Leyweg	Blood					the Netherlands	NLD	no	no	no	yes	no	no	no	yes	no
26975_2#204_1	26975_2#204	ERR4406544	E03182	52°30'	05°45'	30	35	15	UMCU	2006	Hospitalised patient	Antonius location Nieuwegein	Blood					the Netherlands	NLD	no	no	no	yes	yes	no	no	yes	no
28099_2#212_1	28099_2#212	ERR3865106	SN292	39°30'	-08°00'	59	42	27	UNIV PORTO	2006	Environment			Dust				Portugal	PRT	no	yes	yes	yes	yes	yes	no	yes	no
28099_2#221_1	28099_2#221	ERR3865113	SN245	39°30'	-08°00'	445	23	114	UNIV PORTO	2006	Environment			Manure				Portugal	PRT	no	yes	yes	yes	yes	yes	no	yes	no
27725_1#112_1	27725_1#112	ERR3769352	C4079	40°00'	-04°00'	133	52	4	UNIV RIOJA	2007	Non-hospitalised person		Faeces					Spain	ESP	no	no	no	yes	no	no	no	yes	no
27725_1#206_1	27725_1#206	ERR3769376	M166	40°00'	-04°00'	59	42	27	HRYC	2007	Hospitalised patient	Hospital Universitario Ramon y Cajal	Blood					Spain	ESP	no	yes	yes	yes	yes	no	no	yes	no
28099_2#361_1	28099_2#361	ERR3865228	HVR8	39°30'	-08°00'	397	65	83	UNIV PORTO	2007	Hospitalised patient	NA	Urine					Portugal	PRT	no	no	no	yes	no	no	no	yes	no
28157_4#185_1	28157_4#185	ERR3904934	SN318	39°30'	-08°00'	74	23	53	UNIV PORTO	2007	Environment			Feed				Portugal	PRT	no	yes	yes	yes	yes	no	no	yes	no
28157_4#218_1	28157_4#218	ERR3904967	CHCB3	39°30'	-08°00'	6	58	2	UNIV PORTO	2007	Hospitalised patient	NA	Urine					Portugal	PRT	yes	yes	yes	yes	yes	no	no	yes	no
28157_4#255_1	28157_4#255	ERR3905004	SN651	39°30'	-08°00'	16	68	3	UNIV PORTO	2007	Environment			Feed				Portugal	PRT	no	yes	yes	yes	yes	no	no	yes	no
28157_4#263_1	28157_4#263	ERR3905012	SN816	39°30'	-08°00'	21	14	5	UNIV PORTO	2007	Farm animal					Skin	Pig (Sus scrofa domesticus)	Portugal	PRT	no	yes	yes	yes	yes	no	no	yes	no
28157_4#280_1	28157_4#280	ERR3905029	SN468	39°30'	-08°00'	35	20	29	UNIV PORTO	2007	Environment			Feed				Portugal	PRT	no	yes	yes	yes	yes	yes	no	yes	no
28157_4#87_1	28157_4#87	ERR3904836	SN171	39°30'	-08°00'	35	20	29	UNIV PORTO	2007	Farm animal					NA	Pig (Sus scrofa domesticus)	Portugal	PRT	no	yes	yes	yes	yes	yes	no	yes	no
28157_4#95_1	28157_4#95	ERR3904844	SN681	39°30'	-08°00'	16	23	3	UNIV PORTO	2007	Farm animal					NA	Pig (Sus scrofa domesticus)	Portugal	PRT	no	yes	no	yes	yes	no	no	yes	no
28157_4#99_1	28157_4#99	ERR3904848	SN503	39°30'	-08°00'	21	14	5	UNIV PORTO	2007	Environment			Dust				Portugal	PRT	no	yes	yes	yes	yes	no	no	yes	no
27688_1#103_1	27688_1#103	ERR3769032	C7714	40°00'	-04°00'	65	12	40	UNIV RIOJA	2008	Others					Faeces	Wood mouse (Apodemus sylvaticus)	Spain	ESP	no	no	no	yes	no	no	no	yes	no
27688_1#204_1	27688_1#204	ERR3769133	C7721	40°00'	-04°00'	579	38	39	UNIV RIOJA	2008	Others					Faeces	Wood mouse (Apodemus sylvaticus)	Spain	ESP	no	no	no	yes	no	no	no	yes	no
27688_1#220_1	27688_1#220	ERR3769149	C7534	40°00'	-04°00'	NA	30	63	UNIV RIOJA	2008	Others					Faeces	Black rat (Rattus rattus)	Spain	ESP	no	no	no	yes	no	no	no	yes	no
27688_1#225_1	27688_1#225	ERR3769154	M96	40°00'	-04°00'	209	65	37	HRYC	2008	Hospitalised patient	Hospital Universitario Ramon y Cajal	Blood					Spain	ESP	no	no	no	yes	no	no	no	yes	no
27688_1#260_1	27688_1#260	ERR3769189	C7723	40°00'	-04°00'	NA	27	107	UNIV RIOJA	2008	Others					Faeces	Red squirrel (Sciurus vulgaris)	Spain	ESP	no	no	no	yes	no	no	no	yes	no
27688_1#337_1	27688_1#337	ERR3769266	C7507	40°00'	-04°00'	165	23	76	UNIV RIOJA	2008	Others					Faeces	Black rat (Rattus rattus)	Spain	ESP	no	no	no	yes	no	no	no	yes	no
27688_1#341_1	27688_1#341	ERR3769270	C7537	40°00'	-04°00'	NA	56	151	UNIV RIOJA	2008	Others					Faeces	Black rat (Rattus rattus)	Spain	ESP	no	no	no	yes	no	no	no	yes	no
27688_1#347_1	27688_1#347	ERR3769276	M125	40°00'	-04°00'	6	24	2	HRYC	2008	Hospitalised patient	Hospital Universitario Ramon y Cajal	Blood					Spain	ESP	no	yes	yes	yes	yes	yes	no	yes	no
27688_1#375_1	27688_1#375	ERR3769304	M176	40°00'	-04°00'	314	11	69	HRYC	2008	Hospitalised patient	Hospital Universitario Ramon y Cajal	Blood					Spain	ESP	no	no	yes	yes	yes	no	no	yes	no
27688_1#74_1	27688_1#74	ERR3769003	C7728	40°00'	-04°00'	277	31	110	UNIV RIOJA	2008	Others					Faeces	Common vole (Microtus arvalis)	Spain	ESP	no	no	no	yes	no	no	no	yes	no
27725_1#182_1	27725_1#182	ERR3769370	M163	40°00'	-04°00'	206	45	4	HRYC	2008	Hospitalised patient	Hospital Universitario Ramon y Cajal	Blood					Spain	ESP	no	no	no	yes	yes	no	no	yes	no
27725_1#72_1	27725_1#72	ERR3769342	C7523	40°00'	-04°00'	71	31	96	UNIV RIOJA	2008	Others					Faeces	Black rat (Rattus rattus)	Spain	ESP	no	no	no	no	no	no	no	yes	no
28157_4#48_1	28157_4#48	ERR3904797	HVR21	39°30'	-08°00'	16	48	3	UNIV PORTO	2008	Hospitalised patient	NA	Blood					Portugal	PRT	no	yes	yes	yes	yes	yes	no	yes	no
27688_1#101_1	27688_1#101	ERR3769030	M299	40°00'	-04°00'	25	13	4	HRYC	2009	Hospitalised patient	Hospital Universitario Ramon y Cajal	Faeces					Spain	ESP	no	no	no	yes	yes	no	no	yes	no
27688_1#170_1	27688_1#170	ERR3769099	M329	40°00'	-04°00'	56	35	15	HRYC	2009	Non-hospitalised person		Faeces					Spain	ESP	no	no	no	yes	yes	no	no	yes	no
27688_1#194_1	27688_1#194	ERR3769123	M393	40°00'	-04°00'	515	23	14	HRYC	2009	Non-hospitalised person		Faeces					Spain	ESP	no	no	no	yes	no	no	no	yes	no
27688_1#202_1	27688_1#202	ERR3769131	M387	40°00'	-04°00'	116	63	19	HRYC	2009	Hospitalised patient	Hospital Universitario Ramon y Cajal	Faeces					Spain	ESP	no	no	yes	yes	yes	no	no	yes	no
27688_1#215_1	27688_1#215	ERR3769144	M389	40°00'	-04°00'	96	35	30	HRYC	2009	Non-hospitalised person		Faeces					Spain	ESP	no	yes	yes	yes	yes	no	no	yes	no
27688_1#230_1	27688_1#230	ERR3769159	M331	40°00'	-04°00'	62	13	4	HRYC	2009	Non-hospitalised person		Faeces					Spain	ESP	no	no	no	yes	yes	no	no	yes	no
27688_1#235_1	27688_1#235	ERR3769164	M348	40°00'	-04°00'	116	63	19	HRYC	2009	Non-hospitalised person		Faeces					Spain	ESP	no	no	no	yes	yes	no	no	yes	no
27688_1#266_1	27688_1#266	ERR3769195	M277	40°00'	-04°00'	6	50	2	HRYC	2009	Non-hospitalised person		Faeces					Spain	ESP	no	yes	yes	yes	yes	no	no	yes	no
27688_1#267_1	27688_1#267	ERR3769196	M283	40°00'	-04°00'	6	50	2	HRYC	2009	Hospitalised patient	Hospital Universitario Ramon y Cajal	Faeces					Spain	ESP	no	yes	yes	yes	yes	no	no	yes	no
27688_1#292_1	27688_1#292	ERR3769221	M312	40°00'	-04°00'	40	2	1	HRYC	2009	Non-hospitalised person		Faeces					Spain	ESP	no	no	no	yes	no	no	no	yes	no
27688_1#303_1	27688_1#303	ERR3769232	M59	40°00'	-04°00'	273	27	52	HRYC	2009	Hospitalised patient	Hospital Universitario Ramon y Cajal	Blood					Spain	ESP	no	no	no	yes	no	no	no	yes	no
27688_1#304_1	27688_1#304	ERR3769233	M340	40°00'	-04°00'	79	21	71	HRYC	2009	Non-hospitalised person		Faeces					Spain	ESP	no	no	no	yes	yes	no	no	yes	no
27688_1#305_1	27688_1#305	ERR3769234	M308	40°00'	-04°00'	40	34	1	HRYC	2009	Non-hospitalised person		Faeces					Spain	ESP	no	no	yes	yes	yes	no	no	yes	no
27688_1#93_1	27688_1#93	ERR3769022	M318	40°00'	-04°00'	179	43	9	HRYC	2009	Non-hospitalised person		Faeces					Spain	ESP	no	yes	yes	yes	yes	no	no	yes	no
27725_1#24_1	27725_1#24	ERR3769325	M352	40°00'	-04°00'	860	14	44	HRYC	2009	Non-hospitalised person		Faeces					Spain	ESP	no	no	no	yes	yes	no	no	yes	no
27725_1#307_1	27725_1#307	ERR3769401	M326	40°00'	-04°00'	55	25	1	HRYC	2009	Non-hospitalised person		Faeces					Spain	ESP	no	yes	no	yes	yes	no	no	yes	no
27725_1#347_1	27725_1#347	ERR3769411	M383	40°00'	-04°00'	510	25	1	HRYC	2009	Non-hospitalised person		Faeces					Spain	ESP	no	yes	yes	yes	yes	yes	no	yes	no
27725_1#8_1	27725_1#8	ERR3769317	M282	40°00'	-04°00'	6	50	2	HRYC	2009	Hospitalised patient	Hospital Universitario Ramon y Cajal	Faeces					Spain	ESP	no	yes	yes	yes	yes	no	no	yes	no
27688_1#234_1	27688_1#234	ERR3769163	M274	40°00'	-04°00'	6	50	2	HRYC	2010	Hospitalised patient	Hospital Universitario Ramon y Cajal	Faeces					Spain	ESP	no	yes	no	yes	yes	no	no	yes	no
28099_2#54_1	28099_2#54	ERR3864988	M147948	39°30'	-08°00'	6	17	2	UNIV PORTO	2010	Hospitalised patient	NA	Exudate					Portugal	PRT	yes	yes	yes	yes	yes	no	no	yes	no
28157_4#310_1	28157_4#310	ERR3905059	S32_11E	39°30'	-08°00'	594	27	66	UNIV PORTO	2010	Others				Ready-to-eat salad			Portugal	PRT	no	no	no	yes	no	no	no	yes	no
28157_4#330_1	28157_4#330	ERR3905079	S32_12E	39°30'	-08°00'	594	27	66	UNIV PORTO	2010	Others				Ready-to-eat salad			Portugal	PRT	no	no	no	yes	no	no	no	yes	no
28157_4#332_1	28157_4#332	ERR3905081	TR 13_28	39°30'	-08°00'	53	53	92	UNIV PORTO	2010	Environment			Trout aquaculture				Portugal	PRT	no	yes	yes	yes	yes	no	no	yes	no
28157_4#338_1	28157_4#338	ERR3905085	S40_37E	39°30'	-08°00'	579	38	39	UNIV PORTO	2010	Others				Ready-to-eat salad			Portugal	PRT	no	no	no	yes	no	no	no	yes	no
28157_4#85_1	28157_4#85	ERR3904834	S53_38E	39°30'	-08°00'	915	12	50	UNIV PORTO	2010	Others				Ready-to-eat salad			Portugal	PRT	no	no	no	yes	no	no	no	yes	no
27688_1#68_1	27688_1#68	ERR3768997	M94	40°00'	-04°00'	25	13	4	HRYC	2011	Hospitalised patient	Hospital Universitario Ramon y Cajal	Blood					Spain	ESP	no	yes	no	yes	yes	no	no	yes	no
27725_1#262_1	27725_1#262	ERR3769390	M188	40°00'	-04°00'	6	50	2	HRYC	2011	Hospitalised patient	Hospital Universitario Ramon y Cajal	Blood					Spain	ESP	no	yes	yes	yes	yes	no	no	yes	no
28157_4#150_1	28157_4#150	ERR3904899	TR 36_26	39°30'	-08°00'	748	6	82	UNIV PORTO	2011	Environment			Trout aquaculture				Portugal	PRT	no	no	no	yes	no	no	no	yes	no
28157_4#163_1	28157_4#163	ERR3904912	TR 31_26	39°30'	-08°00'	40	14	1	UNIV PORTO	2011	Environment			Trout aquaculture				Portugal	PRT	no	no	no	yes	no	no	no	yes	no
27688_1#112_1	27688_1#112	ERR3769041	C8627	40°00'	-04°00'	NA	12	143	UNIV RIOJA	2012	Wild bird					Faeces	Eurasian eagle-owl (Bubo bubo)	Spain	ESP	no	no	no	yes	no	no	no	yes	no
27688_1#192_1	27688_1#192	ERR3769121	C7412	40°00'	-04°00'	81	19	11	UNIV RIOJA	2012	Wild bird					Faeces	Eurasian sparrowhawk (Accipiter nisus)	Spain	ESP	no	no	no	yes	no	no	no	yes	no
27688_1#240_1	27688_1#240	ERR3769169	C6756	40°00'	-04°00'	869	68	90	UNIV RIOJA	2012	Wild bird					Faeces	Eurasian sparrowhawk (Accipiter nisus)	Spain	ESP	no	no	no	yes	no	no	no	yes	no
27688_1#256_1	27688_1#256	ERR3769185	C7599	40°00'	-04°00'	NA	6	38	UNIV RIOJA	2012	Wild bird					Faeces	Common kestrel (Falco tinnunculus)	Spain	ESP	no	yes	yes	yes	yes	no	no	yes	no
27688_1#329_1	27688_1#329	ERR3769258	C6757	40°00'	-04°00'	869	68	90	UNIV RIOJA	2012	Wild bird					Faeces	Western marsh harrier (Circus aeruginosus)	Spain	ESP	no	no	no	yes	no	no	no	yes	no
27688_1#78_1	27688_1#78	ERR3769007	C6760	40°00'	-04°00'	NA	32	43	UNIV RIOJA	2012	Wild bird					Faeces	Eurasian eagle-owl (Bubo bubo)	Spain	ESP	no	yes	yes	yes	yes	no	no	yes	no
27725_1#11_1	27725_1#11	ERR3769318	C7428	40°00'	-04°00'	843	56	57	UNIV RIOJA	2012	Wild bird					Faeces	Griffon vulture (Gyps fulvus)	Spain	ESP	no	yes	yes	yes	yes	yes	no	yes	no
27725_1#198_1	27725_1#198	ERR3769374	M52	40°00'	-04°00'	NA	16	91	HRYC	2012	Hospitalised patient	Hospital Universitario Ramon y Cajal	Blood					Spain	ESP	no	no	no	yes	no	no	no	yes	no
27725_1#47_1	27725_1#47	ERR3769336	C7406	40°00'	-04°00'	82	26	25	UNIV RIOJA	2012	Wild bird					Faeces	Griffon vulture (Gyps fulvus)	Spain	ESP	no	no	no	yes	yes	no	no	yes	no
28157_4#306_1	28157_4#306	ERR3905055	TR 76_27	39°30'	-08°00'	NA	31	36	UNIV PORTO	2012	Others				Supermarket trout			Portugal	PRT	no	no	no	yes	no	no	no	yes	no
28157_4#42_1	28157_4#42	ERR3904791	TR 52_42	39°30'	-08°00'	200	29	24	UNIV PORTO	2012	Environment			Trout aquaculture				Portugal	PRT	no	yes	yes	yes	yes	yes	no	yes	no
28157_4#56_1	28157_4#56	ERR3904805	TR 63_37	39°30'	-08°00'	49	54	14	UNIV PORTO	2012	Others				Supermarket trout			Portugal	PRT	no	no	no	yes	no	no	no	yes	no
28157_4#64_1	28157_4#64	ERR3904813	TR 59_34	39°30'	-08°00'	68	69	78	UNIV PORTO	2012	Others				Supermarket trout			Portugal	PRT	no	no	no	yes	no	no	no	yes	no
27688_1#114_1	27688_1#114	ERR3769043	M531	-34°00'	-64°00'	225	12	64	HRYC	2013	Hospitalised patient	Hospital Ramon Santamarina	Abscess					Argentina	ARG	no	no	no	yes	no	no	no	yes	no
27688_1#231_1	27688_1#231	ERR3769160	M525	-34°00'	-64°00'	NA	48	108	HRYC	2013	Hospitalised patient	Hospital Ramon Santamarina	Abscess					Argentina	ARG	no	yes	yes	yes	no	no	no	yes	no
27688_1#265_1	27688_1#265	ERR3769194	M244	40°00'	-04°00'	84	6	73	HRYC	2013	Hospitalised patient	Hospital Universitario Ramon y Cajal	Blood					Spain	ESP	no	no	no	no	yes	no	no	yes	no
27725_1#343_1	27725_1#343	ERR3769410	M522	-34°00'	-64°00'	720	57	23	HRYC	2013	Hospitalised patient	Hospital Ramon Santamarina	Blood					Argentina	ARG	no	yes	yes	yes	no	no	no	yes	no
28157_4#171_1	28157_4#171	ERR3904920	A35_1A	-12°30'	18°30'	81	19	11	UNIV PORTO	2013	Non-hospitalised person		NA					Angola	AGO	no	yes	no	no	yes	no	no	yes	no
28157_4#38_1	28157_4#38	ERR3904787	A21_1A	-12°30'	18°30'	116	48	19	UNIV PORTO	2013	Non-hospitalised person		NA					Angola	AGO	no	yes	no	yes	yes	yes	no	yes	no
26975_2#242_1	26975_2#242	ERR4406582	E08496	52°30'	05°45'	273	27	52	UMCU	2014	Non-hospitalised person		Faeces					the Netherlands	NLD	no	no	no	yes	no	no	no	yes	no
27688_1#106_1	27688_1#106	ERR3769035	M507	-34°00'	-64°00'	388	65	18	HRYC	2014	Hospitalised patient	Hospital Ramon Santamarina	Blood					Argentina	ARG	no	yes	no	yes	yes	no	no	yes	no
27688_1#208_1	27688_1#208	ERR3769137	141S-CZ71R	40°00'	-04°00'	NA	5	40	UNIV RIOJA	2014	Others					Faeces	Wild rabbit (Leporidae)	Spain	ESP	no	no	no	yes	no	no	no	yes	no
27688_1#212_1	27688_1#212	ERR3769141	133S-a-CZ67R	40°00'	-04°00'	27	53	34	UNIV RIOJA	2014	Others					Faeces	Wild rabbit (Leporidae)	Spain	ESP	no	no	no	yes	no	no	no	yes	no
27688_1#325_1	27688_1#325	ERR3769254	73S-CZ37R	40°00'	-04°00'	NA	70	36	UNIV RIOJA	2014	Others					Faeces	Wild rabbit (Leporidae)	Spain	ESP	no	no	no	yes	no	no	no	yes	no
27688_1#349_1	27688_1#349	ERR3769278	33S-CZ17R	40°00'	-04°00'	NA	5	40	UNIV RIOJA	2014	Others					Faeces	Wild rabbit (Leporidae)	Spain	ESP	no	no	no	yes	no	no	no	yes	no
27688_1#353_1	27688_1#353	ERR3769282	81S-CZ41R	40°00'	-04°00'	NA	23	109	UNIV RIOJA	2014	Others					Faeces	Wild rabbit (Leporidae)	Spain	ESP	no	no	no	yes	no	no	no	yes	no
27688_1#76_1	27688_1#76	ERR3769005	M184	40°00'	-04°00'	102	32	68	HRYC	2014	Hospitalised patient	Hospital Universitario Ramon y Cajal	Blood					Spain	ESP	no	no	no	yes	yes	no	no	yes	no
27688_1#80_1	27688_1#80	ERR3769009	M138	40°00'	-04°00'	227	11	111	HRYC	2014	Hospitalised patient	Hospital Universitario Ramon y Cajal	Blood					Spain	ESP	no	no	no	yes	no	no	no	yes	no
27725_1#19_1	27725_1#19	ERR3769322	89S-CZ45R	40°00'	-04°00'	NA	11	55	UNIV RIOJA	2014	Others					Faeces	Wild rabbit (Leporidae)	Spain	ESP	no	no	no	yes	no	no	no	yes	no
27725_1#226_1	27725_1#226	ERR3769381	M205	40°00'	-04°00'	335	14	113	HRYC	2014	Hospitalised patient	Hospital Universitario Ramon y Cajal	Blood					Spain	ESP	no	no	no	yes	yes	no	no	yes	no
27725_1#242_1	27725_1#242	ERR3769385	M135	40°00'	-04°00'	207	16	6	HRYC	2014	Hospitalised patient	Hospital Universitario Ramon y Cajal	Blood					Spain	ESP	no	yes	yes	yes	yes	no	no	yes	no
27725_1#254_1	27725_1#254	ERR3769388	M74	40°00'	-04°00'	6	50	2	HRYC	2014	Hospitalised patient	Hospital Universitario Ramon y Cajal	Blood					Spain	ESP	no	yes	yes	yes	yes	no	no	yes	no
27725_1#295_1	27725_1#295	ERR3769398	M518	-34°00'	-64°00'	NA	60	58	HRYC	2014	Hospitalised patient	Hospital Ramon Santamarina	Blood					Argentina	ARG	no	no	no	yes	no	no	no	yes	no
27725_1#59_1	27725_1#59	ERR3769339	49-50S-CZ25R	40°00'	-04°00'	27	53	34	UNIV RIOJA	2014	Others					Faeces	Wild rabbit (Leporidae)	Spain	ESP	no	no	no	yes	no	no	no	yes	no
27725_1#7_1	27725_1#7	ERR3769316	87S-CZ44R	40°00'	-04°00'	NA	70	36	UNIV RIOJA	2014	Others					Faeces	Wild rabbit (Leporidae)	Spain	ESP	no	no	no	yes	no	no	no	yes	no
27688_1#241_1	27688_1#241	ERR3769170	M62	40°00'	-04°00'	56	35	15	HRYC	2015	Hospitalised patient	Hospital Universitario Ramon y Cajal	Blood					Spain	ESP	no	no	no	yes	yes	no	no	yes	no
27688_1#269_1	27688_1#269	ERR3769198	M173	40°00'	-04°00'	21	37	5	HRYC	2015	Hospitalised patient	Hospital Universitario Ramon y Cajal	Blood					Spain	ESP	no	no	no	yes	yes	no	no	yes	no
28157_4#140_1	28157_4#140	ERR3904889	CCT86	39°30'	-08°00'	16	32	3	UNIV PORTO	2015	Hospitalised patient	NA	NA					Portugal	PRT	no	yes	yes	yes	yes	yes	no	yes	no
28157_4#39_1	28157_4#39	ERR3904788	CCT64	39°30'	-08°00'	NA	43	115	UNIV PORTO	2015	Hospitalised patient	NA	NA					Portugal	PRT	no	no	no	yes	yes	no	no	yes	no
28157_4#72_1	28157_4#72	ERR3904821	CCT50	39°30'	-08°00'	40	25	1	UNIV PORTO	2015	Hospitalised patient	NA	NA					Portugal	PRT	no	no	no	yes	no	no	no	yes	no
28157_4#78_1	28157_4#78	ERR3904827	Br13	-10°00'	-55°00'	525	36	18	UNIV PORTO	2015	Hospitalised patient	NA	Colonization					Brazil	BRA	yes	no	yes	yes	yes	no	no	yes	no
28157_4#86_1	28157_4#86	ERR3904835	Br22	-10°00'	-55°00'	525	36	18	UNIV PORTO	2015	Hospitalised patient	NA	NA					Brazil	BRA	yes	yes	yes	yes	yes	no	no	yes	no
28157_4#90_1	28157_4#90	ERR3904839	Br10_1	-10°00'	-55°00'	525	36	18	UNIV PORTO	2015	Hospitalised patient	NA	Diabetic bone					Brazil	BRA	yes	yes	yes	yes	yes	no	no	yes	no
27688_1#342_1	27688_1#342	ERR3769271	C10.028	40°00'	-04°00'	200	29	24	UNIV RIOJA	2016	Environment			Air				Spain	ESP	no	yes	yes	yes	yes	yes	no	yes	no
27688_1#370_1	27688_1#370	ERR3769299	C10.029	40°00'	-04°00'	NA	14	5	UNIV RIOJA	2016	Environment			Air				Spain	ESP	no	yes	yes	yes	yes	no	no	yes	no
27688_1#63_1	27688_1#63	ERR3768992	C10.020	40°00'	-04°00'	708	20	154	UNIV RIOJA	2016	Environment			Air				Spain	ESP	no	yes	yes	yes	yes	yes	yes	yes	no
27688_1#67_1	27688_1#67	ERR3768996	C10.117	40°00'	-04°00'	374	63	19	UNIV RIOJA	2016	Environment			Air				Spain	ESP	no	yes	yes	yes	yes	no	no	yes	no
27725_1#165_1	27725_1#165	ERR3769366	C10.120	40°00'	-04°00'	200	29	24	UNIV RIOJA	2016	Environment			Air				Spain	ESP	no	yes	yes	yes	yes	yes	no	yes	no
28157_4#120_1	28157_4#120	ERR3904869	CCM106	39°30'	-08°00'	191	53	33	UNIV PORTO	2016	Hospitalised patient	NA	NA					Portugal	PRT	no	no	no	yes	yes	no	no	yes	no
28157_4#65_1	28157_4#65	ERR3904814	Br58	-10°00'	-55°00'	525	36	18	UNIV PORTO	2016	Hospitalised patient	NA	Urine					Brazil	BRA	yes	yes	no	yes	yes	no	no	yes	no
28157_4#70_1	28157_4#70	ERR3904819	Br54_1	-10°00'	-55°00'	6	50	2	UNIV PORTO	2016	Hospitalised patient	NA	Colonization					Brazil	BRA	yes	yes	yes	yes	yes	no	no	yes	no
28157_4#88_1	28157_4#88	ERR3904837	CCM35	39°30'	-08°00'	16	69	3	UNIV PORTO	2016	Hospitalised patient	NA	NA					Portugal	PRT	no	yes	yes	yes	yes	no	no	yes	no
28157_4#92_1	28157_4#92	ERR3904841	CCM22	39°30'	-08°00'	143	22	77	UNIV PORTO	2016	Hospitalised patient	NA	NA					Portugal	PRT	no	no	no	yes	no	no	no	yes	no
28157_4#93_1	28157_4#93	ERR3904842	CCM74	39°30'	-08°00'	191	53	33	UNIV PORTO	2016	Hospitalised patient	NA	NA					Portugal	PRT	no	no	no	yes	yes	no	no	yes	no
28157_4#96_1	28157_4#96	ERR3904845	CCM79	39°30'	-08°00'	679	43	115	UNIV PORTO	2016	Hospitalised patient	NA	NA					Portugal	PRT	no	yes	yes	yes	yes	no	no	yes	no
28157_4#209_1	28157_4#209	ERR3904958	c7Ua_50_AE	39°30'	-08°00'	40	66	1	UNIV PORTO	2017	Non-hospitalised person		Urine					Portugal	PRT	no	no	no	yes	yes	no	no	yes	no
28157_4#221_1	28157_4#221	ERR3904970	c12Ua_138_AE	39°30'	-08°00'	62	13	4	UNIV PORTO	2017	Non-hospitalised person		Urine					Portugal	PRT	no	no	no	yes	yes	no	no	yes	no
28157_4#241_1	28157_4#241	ERR3904990	c3VSb_36_AE	39°30'	-08°00'	86	31	56	UNIV PORTO	2017	Non-hospitalised person		Vagina					Portugal	PRT	no	no	yes	yes	yes	yes	no	yes	no
28157_4#245_1	28157_4#245	ERR3904994	c5VSa_63_AE	39°30'	-08°00'	480	43	163	UNIV PORTO	2017	Non-hospitalised person		Vagina					Portugal	PRT	no	yes	yes	yes	yes	yes	no	yes	no
28157_4#258_1	28157_4#258	ERR3905007	c4VSb_26_AE	39°30'	-08°00'	40	66	1	UNIV PORTO	2017	Non-hospitalised person		Vagina					Portugal	PRT	no	no	no	yes	yes	no	no	yes	no
28157_4#299_1	28157_4#299	ERR3905048	c14Ua_4_AN	39°30'	-08°00'	179	43	9	UNIV PORTO	2017	Non-hospitalised person		Urine					Portugal	PRT	no	no	no	yes	yes	no	no	yes	no
28157_4#260_1	28157_4#260	ERR3905009	F1112	39°30'	-08°00'	21	52	5	UNIV PORTO	2018	Farm animal					NA	Poultry	Portugal	PRT	no	yes	yes	yes	yes	yes	no	yes	no
28157_4#264_1	28157_4#264	ERR3905013	F1144	39°30'	-08°00'	256	56	45	UNIV PORTO	2018	Farm animal					NA	Poultry	Portugal	PRT	no	yes	no	yes	yes	yes	no	yes	no
28157_4#276_1	28157_4#276	ERR3905025	F1173	39°30'	-08°00'	NA	59	32	UNIV PORTO	2018	Farm animal					NA	Poultry	Portugal	PRT	no	yes	no	yes	yes	yes	no	yes	no
28157_4#281_1	28157_4#281	ERR3905030	F1219	39°30'	-08°00'	21	52	5	UNIV PORTO	2018	Farm animal					NA	Poultry	Portugal	PRT	no	yes	yes	yes	yes	yes	no	yes	no
28157_4#283_1	28157_4#283	ERR3905032	c27Ua_1_AE	39°30'	-08°00'	44	2	22	UNIV PORTO	2018	Others		Urine					Portugal	PRT	no	no	no	yes	yes	no	no	yes	no
27688_1#300_1	27688_1#300	ERR3769229	M453	47°00'	20°00'	16	5	3	HRYC	NA	Hospitalised patient	NA	NA					Hungary	HUN	yes	yes	yes	yes	yes	no	no	yes	no
28099_2#254_1	28099_2#254	ERR3865138	265T	34°00'	09°00'	NA	33	81	UNIV PORTO	NA	Others					Faeces	Dog (Canis lupus familiaris)	Tunisia	TUN	no	no	no	yes	no	no	no	yes	no
28099_2#281_1	28099_2#281	ERR3865158	13T	34°00'	09°00'	117	21	28	UNIV PORTO	NA	Environment			Sewage				Tunisia	TUN	no	no	yes	yes	no	no	no	yes	no
28099_2#340_1	28099_2#340	ERR3865207	283T	34°00'	09°00'	100	5	46	UNIV PORTO	NA	Farm animal					Faeces	Bovine (Bos taurus)	Tunisia	TUN	no	no	no	yes	no	no	no	yes	no
28099_2#67_1	28099_2#67	ERR3864998	377T	34°00'	09°00'	84	27	73	UNIV PORTO	NA	Farm animal					Meat	Bovine (Bos taurus)	Tunisia	TUN	no	yes	no	no	yes	no	no	yes	no
28157_4#11_1	28157_4#11	ERR3904760	64T	34°00'	09°00'	19	49	21	UNIV PORTO	NA	Environment			Sewage				Tunisia	TUN	no	yes	yes	yes	yes	yes	no	yes	no
28157_4#164_1	28157_4#164	ERR3904913	192T	34°00'	09°00'	498	16	79	UNIV PORTO	NA	Farm animal					Faeces	Poultry	Tunisia	TUN	no	no	no	yes	no	no	no	yes	no
28157_4#168_1	28157_4#168	ERR3904917	14T	34°00'	09°00'	23	51	4	UNIV PORTO	NA	Environment			Sewage				Tunisia	TUN	no	no	no	yes	yes	no	no	yes	no
28157_4#208_1	28157_4#208	ERR3904957	393T	34°00'	09°00'	25	13	4	UNIV PORTO	NA	Hospitalised patient	NA	Urine					Tunisia	TUN	no	no	no	yes	yes	no	no	yes	no
28157_4#211_1	28157_4#211	ERR3904960	T112	NA	NA	387	22	13	UNIV PORTO	NA	Others							NA	NA	no	no	no	yes	no	no	no	yes	no
28157_4#228_1	28157_4#228	ERR3904977	414T	34°00'	09°00'	21	8	16	UNIV PORTO	NA	Hospitalised patient	NA	Faeces					Tunisia	TUN	no	no	no	yes	no	no	no	yes	no
28157_4#249_1	28157_4#249	ERR3904998	237T	34°00'	09°00'	22	44	5	UNIV PORTO	NA	Farm animal					Faeces	Poultry	Tunisia	TUN	no	yes	yes	yes	yes	yes	no	yes	no
28157_4#3_1	28157_4#3	ERR3904752	199T	34°00'	09°00'	16	69	3	UNIV PORTO	NA	Farm animal					Faeces	Poultry	Tunisia	TUN	no	no	no	yes	no	no	no	yes	no
28157_4#300_1	28157_4#300	ERR3905049	688T	34°00'	09°00'	86	33	56	UNIV PORTO	NA	Others							Tunisia	TUN	no	yes	yes	yes	yes	no	no	yes	no
28157_4#308_1	28157_4#308	ERR3905057	416T	34°00'	09°00'	21	8	16	UNIV PORTO	NA	Hospitalised patient	NA	Faeces					Tunisia	TUN	no	no	no	yes	no	no	no	yes	no
28157_4#316_1	28157_4#316	ERR3905065	598T	34°00'	09°00'	314	11	69	UNIV PORTO	NA	Others							Tunisia	TUN	no	no	yes	yes	yes	no	no	yes	no
28157_4#7_1	28157_4#7	ERR3904756	90T	34°00'	09°00'	117	38	28	UNIV PORTO	NA	Environment			Sewage				Tunisia	TUN	no	no	no	yes	no	no	no	yes	no
26975_1#2_1	26975_1#2	ERR4405959	E00062	52°30'	05°45'	32	38	12	UMCU	1996	Non-hospitalised person		Faeces					the Netherlands	NLD	yes	yes	yes	yes	yes	no	no	no	yes
26975_1#270_1	26975_1#270	ERR4406227	E03819	52°30'	05°45'	44	2	22	UMCU	1996	Hospitalised patient	Erasmus MC	Blood					the Netherlands	NLD	no	no	no	yes	yes	no	no	no	yes
26975_1#61_1	26975_1#61	ERR4406018	E01047	52°30'	05°45'	228	38	74	UMCU	1998	Non-hospitalised person		Faeces					the Netherlands	NLD	no	no	no	yes	no	no	no	no	yes
28157_4#170_1	28157_4#170	ERR3904919	F88	39°30'	-08°00'	NA	33	67	UNIV PORTO	1999	Others				Retail poultry			Portugal	PRT	no	no	yes	yes	yes	no	no	no	yes
26975_1#238_1	26975_1#238	ERR4406195	E03632	52°30'	05°45'	862	31	70	UMCU	2000	Hospitalised patient	Leyweg	Blood					the Netherlands	NLD	no	no	no	yes	no	no	no	no	yes
26975_2#186_1	26975_2#186	ERR4406526	E03086	52°30'	05°45'	482	4	75	UMCU	2000	Hospitalised patient	Antonius location Nieuwegein	Blood					the Netherlands	NLD	no	no	no	yes	no	no	no	no	yes
28099_2#180_1	28099_2#180	ERR3865082	C433	39°30'	-08°00'	NA	39	87	UNIV PORTO	2001	Non-hospitalised person		NA					Portugal	PRT	no	yes	yes	yes	yes	no	no	no	yes
28099_2#237_1	28099_2#237	ERR3865125	C386	39°30'	-08°00'	55	25	1	UNIV PORTO	2001	Non-hospitalised person		NA					Portugal	PRT	no	no	no	yes	yes	no	no	no	yes
28157_4#143_1	28157_4#143	ERR3904892	H151B	39°30'	-08°00'	6	9	2	UNIV PORTO	2001	Hospitalised patient	NA	NA					Portugal	PRT	no	no	yes	yes	yes	no	no	no	yes
28157_4#307_1	28157_4#307	ERR3905056	C76	39°30'	-08°00'	NA	69	93	UNIV PORTO	2001	Non-hospitalised person		NA					Portugal	PRT	no	yes	no	yes	yes	no	no	no	yes
27688_1#122_1	27688_1#122	ERR3769051	M449	38°00'	-97°00'	158	48	104	HRYC	2002	Hospitalised patient	NA	Blood					the USA	USA	yes	yes	yes	yes	yes	yes	no	no	yes
27688_1#195_1	27688_1#195	ERR3769124	M433	38°00'	-97°00'	2	57	23	HRYC	2002	Hospitalised patient	NA	Urine					the USA	USA	yes	yes	yes	yes	no	no	no	no	yes
28157_4#37_1	28157_4#37	ERR3904786	H199	39°30'	-08°00'	16	32	3	UNIV PORTO	2002	Hospitalised patient	NA	Urine					Portugal	PRT	no	yes	yes	yes	yes	yes	no	no	yes
26975_1#251_1	26975_1#251	ERR4406208	E03676	52°30'	05°45'	NA	40	6	UMCU	2003	Hospitalised patient	Leyweg	Blood					the Netherlands	NLD	no	yes	yes	yes	yes	yes	no	no	yes
26975_2#177_1	26975_2#177	ERR4406517	E03052	52°30'	05°45'	466	21	63	UMCU	2004	Hospitalised patient	MC Alkmaar	Blood					the Netherlands	NLD	yes	no	yes	yes	no	no	no	no	yes
27688_1#113_1	27688_1#113	ERR3769042	M466	20°00'	77°00'	28	67	6	HRYC	2004	Hospitalised patient	Sri Ramachandra Medical College	Urine					India	IND	no	yes	yes	yes	yes	no	no	no	yes
27688_1#117_1	27688_1#117	ERR3769046	M481	20°00'	77°00'	41	15	20	HRYC	2004	Hospitalised patient	Sri Ramachandra Medical College	Urine					India	IND	no	no	no	yes	yes	no	no	no	yes
27688_1#214_1	27688_1#214	ERR3769143	M485	20°00'	77°00'	4	69	60	HRYC	2004	Hospitalised patient	Sri Ramachandra Medical College	Urine					India	IND	no	yes	no	yes	yes	no	no	no	yes
26975_2#112_1	26975_2#112	ERR4406452	E07791	40°00'	-04°00'	32	38	12	UMCU	2005	Wild bird					NA	Wild duck (Anatidae)	Spain	ESP	no	yes	no	yes	yes	no	no	no	yes
26975_1#207_1	26975_1#207	ERR4406164	E03450	52°30'	05°45'	6	58	2	UMCU	2006	Hospitalised patient	VUMC	Blood					the Netherlands	NLD	no	yes	yes	yes	yes	yes	no	no	yes
28099_2#335_1	28099_2#335	ERR3865202	SN728	39°30'	-08°00'	NA	2	59	UNIV PORTO	2007	Environment			Sewage				Portugal	PRT	no	yes	yes	yes	yes	yes	no	no	yes
27688_1#179_1	27688_1#179	ERR3769108	C7738	40°00'	-04°00'	NA	2	65	UNIV RIOJA	2008	Others					Faeces	Algerian mouse (Mus spretus)	Spain	ESP	no	no	no	yes	no	no	no	no	yes
27688_1#66_1	27688_1#66	ERR3768995	C7542	40°00'	-04°00'	NA	2	65	UNIV RIOJA	2008	Others					Faeces	Black rat (Rattus rattus)	Spain	ESP	no	no	no	yes	no	no	no	no	yes
27688_1#25_1	27688_1#25	ERR3768959	M376	40°00'	-04°00'	330	59	32	HRYC	2009	Non-hospitalised person		Faeces					Spain	ESP	no	yes	yes	yes	no	no	no	no	yes
27688_1#33_1	27688_1#33	ERR3768965	M349	40°00'	-04°00'	141	68	42	HRYC	2009	Non-hospitalised person		Faeces					Spain	ESP	no	no	no	yes	yes	no	no	no	yes
27688_1#332_1	27688_1#332	ERR3769261	M280	40°00'	-04°00'	6	17	2	HRYC	2009	Hospitalised patient	Hospital Universitario Ramon y Cajal	Faeces					Spain	ESP	yes	yes	yes	yes	yes	yes	no	no	yes
27688_1#360_1	27688_1#360	ERR3769289	M344	40°00'	-04°00'	86	33	56	HRYC	2009	Hospitalised patient	Hospital Universitario Ramon y Cajal	Faeces					Spain	ESP	no	no	yes	yes	yes	yes	no	no	yes
27688_1#384_1	27688_1#384	ERR3769313	M350	40°00'	-04°00'	168	46	17	HRYC	2009	Non-hospitalised person		Faeces					Spain	ESP	no	no	no	yes	no	no	no	no	yes
27688_1#53_1	27688_1#53	ERR3768982	M372	40°00'	-04°00'	58	18	10	HRYC	2009	Non-hospitalised person		Faeces					Spain	ESP	no	no	no	yes	yes	no	no	no	yes
27725_1#380_1	27725_1#380	ERR3769419	M394	40°00'	-04°00'	515	23	14	HRYC	2009	Non-hospitalised person		Faeces					Spain	ESP	no	no	no	yes	no	yes	no	no	yes
27688_1#162_1	27688_1#162	ERR3769091	M510	-34°00'	-64°00'	179	43	9	HRYC	2010	Hospitalised patient	Hospital Ramon Santamarina	Peritoneal fluid					Argentina	ARG	no	yes	yes	yes	yes	no	no	no	yes
27688_1#193_1	27688_1#193	ERR3769122	M153	40°00'	-04°00'	16	68	3	HRYC	2011	Hospitalised patient	Hospital Universitario Ramon y Cajal	Blood					Spain	ESP	no	yes	yes	yes	yes	yes	no	no	yes
27688_1#232_1	27688_1#232	ERR3769161	C8067	40°00'	-04°00'	300	32	43	UNIV RIOJA	2012	Wild bird					Faeces	Northern goshawk (Accipiter gentilis)	Spain	ESP	no	no	yes	yes	yes	no	no	no	yes
27725_1#116_1	27725_1#116	ERR3769353	C8073	40°00'	-04°00'	81	19	11	UNIV RIOJA	2012	Wild bird					Faeces	Western marsh harrier (Circus aeruginosus)	Spain	ESP	no	no	no	yes	no	no	no	no	yes
28157_4#60_1	28157_4#60	ERR3904809	TR 58_30	39°30'	-08°00'	40	66	1	UNIV PORTO	2012	Others				Supermarket trout			Portugal	PRT	no	no	no	yes	yes	no	no	no	yes
27688_1#130_1	27688_1#130	ERR3769059	M508	-34°00'	-64°00'	604	21	53	HRYC	2013	Hospitalised patient	Hospital Ramon Santamarina	Blood					Argentina	ARG	no	no	no	yes	no	no	no	no	yes
27688_1#359_1	27688_1#359	ERR3769288	M147	40°00'	-04°00'	179	43	9	HRYC	2013	Hospitalised patient	Hospital Universitario Ramon y Cajal	Blood					Spain	ESP	no	yes	yes	yes	yes	no	no	no	yes
27688_1#236_1	27688_1#236	ERR3769165	139S-CZ70R	40°00'	-04°00'	40	25	1	UNIV RIOJA	2014	Others					Faeces	Wild rabbit (Leporidae)	Spain	ESP	no	no	no	yes	yes	no	no	no	yes
27725_1#384_1	27725_1#384	ERR3769420	M502	-34°00'	-64°00'	NA	60	58	HRYC	2014	Hospitalised patient	Hospital Ramon Santamarina	Abscess					Argentina	ARG	no	no	no	yes	no	no	no	no	yes
27725_1#39_1	27725_1#39	ERR3769332	93S-CZ47R	40°00'	-04°00'	NA	70	36	UNIV RIOJA	2014	Others					Faeces	Wild rabbit (Leporidae)	Spain	ESP	no	no	no	yes	no	no	no	no	yes
28099_2#124_1	28099_2#124	ERR3865040	CCT120	39°30'	-08°00'	398	31	103	UNIV PORTO	2015	Hospitalised patient	NA	NA					Portugal	PRT	no	no	no	yes	no	no	no	no	yes
28157_4#192_1	28157_4#192	ERR3904941	353T	34°00'	09°00'	133	52	4	UNIV PORTO	NA	Hospitalised patient	NA	Urine					Tunisia	TUN	no	no	no	yes	no	no	no	no	yes
28157_4#244_1	28157_4#244	ERR3904993	487T	34°00'	09°00'	133	52	4	UNIV PORTO	NA	Hospitalised patient	NA	Blood					Tunisia	TUN	no	no	no	yes	no	no	no	no	yes
