# Supplementary material for: Pangenome-spanning epistasis and coselection analysis via de Bruijn graphs
Source: HighWire-hosted journal article supplement (doi:10.1101/gr.278485.123), 2024-07-01
Supplement: Supplemental_Fig_S1.pdf [file Supplemental_Fig_S1.pdf]

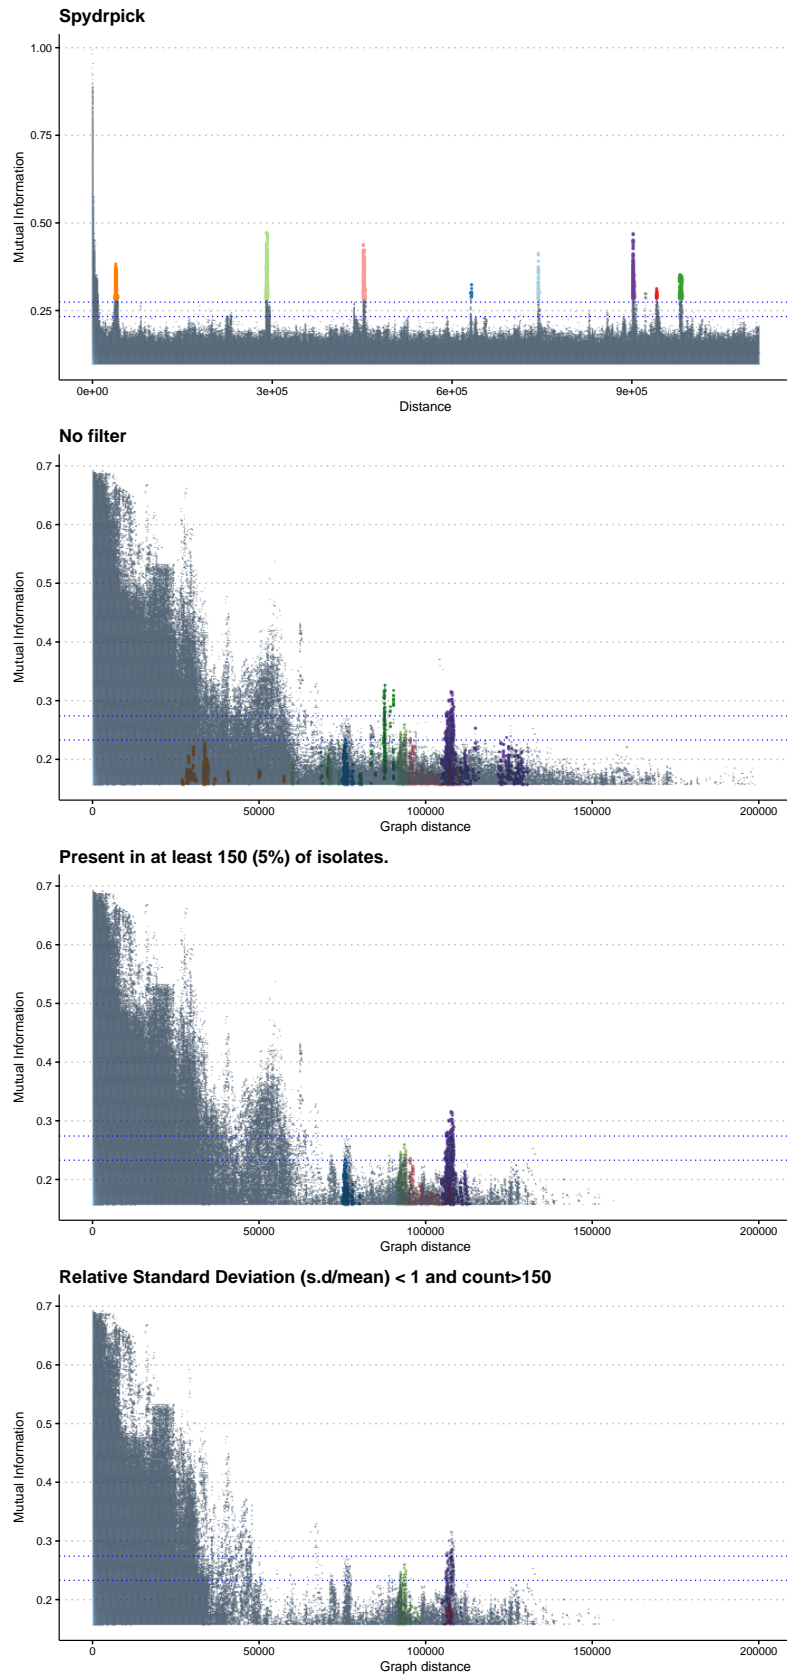

**Supplementary Figure 1.** Manhattan plots indicating the distribution of MI values by distance with different filters in the PAN-GWES pipeline applied to the *S. pneumoniae* dataset. The top facet indicates the results of the Spydrpick algorithm that relies on a reference genome alignment.
