# Supplementary material for: Pangenome-spanning epistasis and coselection analysis via de Bruijn graphs
Source: HighWire-hosted journal article supplement (doi:10.1101/gr.278485.123), 2024-07-01
Supplement: Supplemental_Fig_S2.pdf [file Supplemental_Fig_S2.pdf]

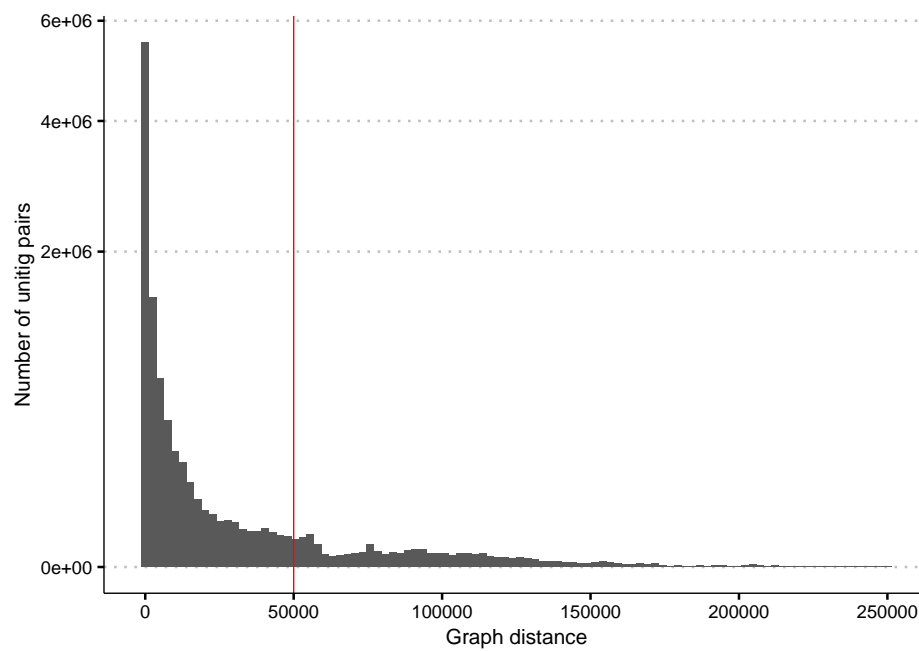

**Supplementary Figure 2.** A histogram indicating the number of unitig pairs versus the average distance across each colour in the coloured de-Bruijn graph for the pneumococcal dataset. Only pairs above 50,000bp were considered in the final analysis.
