# Supplementary material for: Pangenome-spanning epistasis and coselection analysis via de Bruijn graphs
Source: HighWire-hosted journal article supplement (doi:10.1101/gr.278485.123), 2024-07-01
Supplement: Supplemental_Fig_S3.pdf [file Supplemental_Fig_S3.pdf]

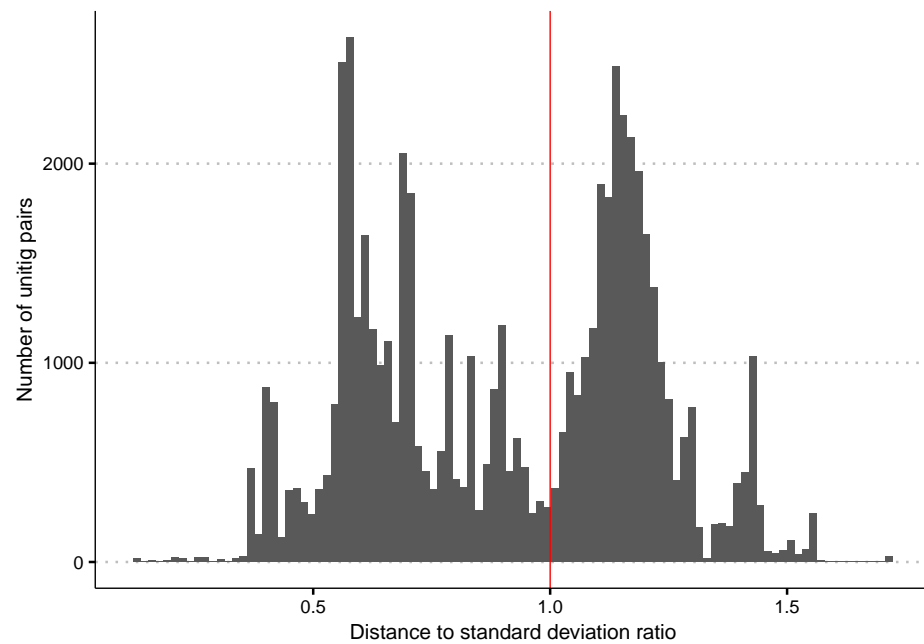

**Supplementary Figure 3.** The number of unitig pairs versus the standard deviation of their distance in each subgraph represented by an individual colour in the full coloured de Bruijn graph.
