# Supplementary material for: Pangenome-spanning epistasis and coselection analysis via de Bruijn graphs
Source: HighWire-hosted journal article supplement (doi:10.1101/gr.278485.123), 2024-07-01
Supplement: Supplemental_Fig_S6.pdf [file Supplemental_Fig_S6.pdf]

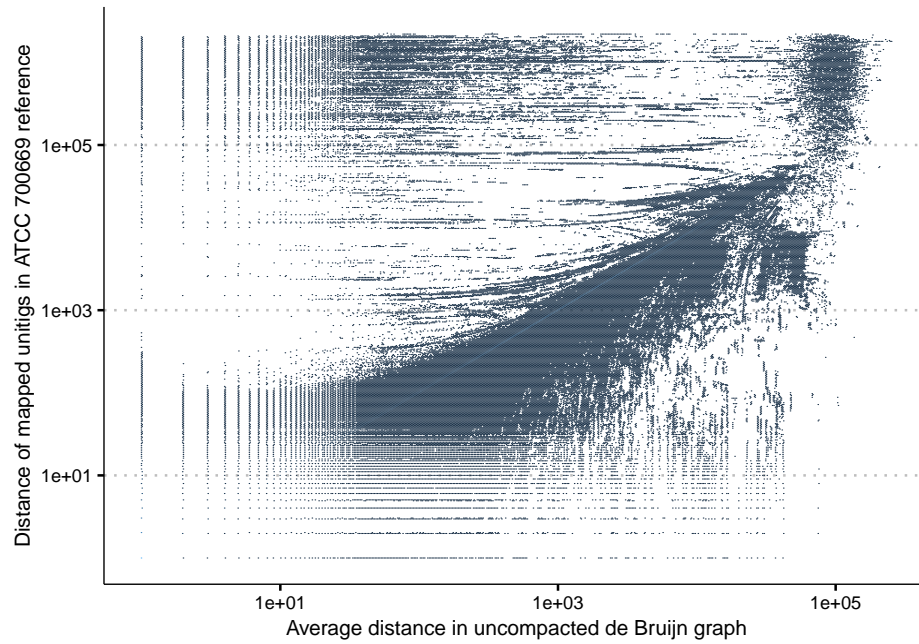

**Supplementary Figure 6.** The graphical distance in terms of the average number of nodes along the uncompact de Bruijn graph versus the distance between unitigs mapped to the pneumococcal reference genome.
