# Supplementary material for: Pangenome-spanning epistasis and coselection analysis via de Bruijn graphs
Source: HighWire-hosted journal article supplement (doi:10.1101/gr.278485.123), 2024-07-01
Supplement: Supplemental_Fig_S7.pdf [file Supplemental_Fig_S7.pdf]

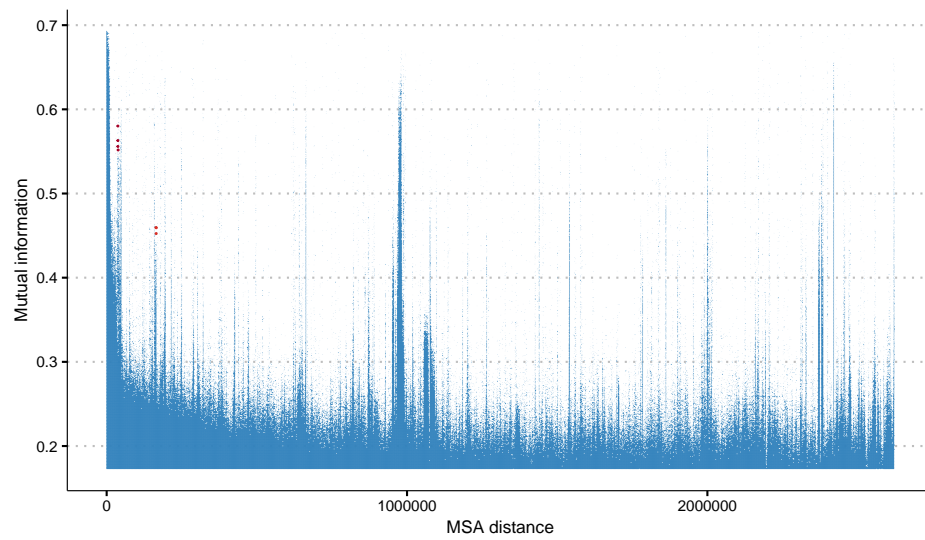

**Supplementary Figure 7.** The Manhattan plot produced from running Spydrpick on the *E. faecalis* data using a reference based distance. An internal reference, E00113 (ERR4406486) was selected as it harboured most of the unitig hits and had a hybrid complete circular genome assembly.
